1 **Promyelocytic leukemia nuclear body (PML-NB) -free intranuclear**  
2 **milieu facilitates development of oocytes in mice**

3

4 Osamu Udagawa, Ayaka Kato-Udagawa, and Seishiro Hirano

5

6 Center for Health and Environmental Risk Research, National Institute for

7 Environmental Studies, Japan

8

9 Running title: Lack of PML-NBs in oocytes

10

11 Correspondence to: Osamu Udagawa (E-mail: [udagawa.osamu@nies.go.jp](mailto:udagawa.osamu@nies.go.jp))

12 Center for Health and Environmental Risk Research, National Institute for

13 Environmental Studies, 16-2 Onogawa, Tsukuba, Ibaraki 305-8506, Japan; Tel.:

14 +81-29-850-2439

15

16 Keywords: membrane-less organelle, solubility shift, PML-NBs, SUMO, meiosis,

17 oocyte

18

19

20 **Abstract**

21 Promyelocytic leukemia (PML) nuclear bodies (PML-NBs), a class of membrane-less  
22 organelles in cells, are involved in multiple biological activities and are present  
23 throughout cells of adult organisms. Although the oocyte nucleus is an active region for  
24 the flux of multiple non-membranous organelles, PML-NBs have been predicted to be  
25 absent from oocytes. Here, we show that the deliberate assembly of PML-NBs during  
26 oocyte growth preferentially sequestered Small Ubiquitin-related Modifier (SUMO)  
27 protein from the nucleoplasm. SUMO not only was involved in the regulation of oocyte  
28 nuclear maturation but also was committed to the response, mediated by liquid droplet  
29 formation, to multiple stressors including nucleolar stress and proteotoxic stresses.  
30 Exogenous assembly of PML-NBs in the nucleus of oocytes affected the efficiency of  
31 the response of SUMO. These observations suggest that the PML-NB-free intranuclear  
32 milieu ensures that a reserve of SUMO remains available for emergent responses in  
33 oocyte development. This work demonstrated a benefit of the PML-NB-free  
34 intranuclear milieu, namely the ability to redirect the flux of SUMO otherwise needed  
35 to control PML-NB dynamics.

## 36 **Introduction**

37 The nuclei of mammalian interphase cells typically contain dozens of promyelocytic  
38 leukemia (PML) nuclear bodies (PML-NBs), membrane-less organelles that are  
39 formed by phase separation. PML-NBs consist of a shell of PML protein surrounding  
40 an inner core that harbors over a hundred proteins as “client molecules”, notably  
41 including Small Ubiquitin-related Modifier (SUMO), a well-defined posttranslational  
42 modifier (Lallemand-Breitenbach and de The, 2018). The PML protein is the only  
43 resident molecule essential for the formation of PML-NBs (Lamond and Earnshaw,  
44 1998), and polymerized PML undergoes efficient SUMOylation (Wang et al., 2018)  
45 (Li et al., 2019). Six nuclear PML isoforms have been identified in human cells; each  
46 isoform has a different C-terminal region, a distinction that results from alternative  
47 splicing of the PML-encoding primary transcript (Nisole et al., 2013). Five of the 6  
48 isoforms (excepting PMLVI) have a SUMO interaction motif (SIM) (Cappadocia et al.,  
49 2015), a domain through which PML can non-covalently interact with SUMO or other  
50 SUMOylated proteins that also often contain SIMs (Sahin et al., 2014). Multivalent  
51 interaction between poly-SUMO and poly-SIM is postulated as a driving force that  
52 endows PML-NBs with liquid-like properties (Banani et al., 2016). The assembly  
53 generated by mixing multivalent molecules generally shows decreased solubility,  
54 thereby promoting phase separation of the assembly; the solubility shift of resident  
55 protein is a critical factor in liquid droplet formation (Banani et al., 2017). It long has  
56 been known that specific binding of arsenic or antimony induces a sharp decline in the  
57 solubility of PML (Müller et al., 1998; Hirano et al., 2015). The membrane-less  
58 properties of PML-NBs may facilitate dynamic interactions among PML-NB client  
59 molecules, which have been shown to be involved in a number of biological processes,

60 including viral infection (Chelbi-Alix et al., 1995; Puvion-Dutilleul et al., 1995;  
61 Everett and Chelbi-Alix, 2007), DNA damage response (Louria-Hayon et al., 2003;  
62 Bernardi et al., 2004; Bøe et al., 2006), senescence (Ferbeyre et al., 2000; Pearson et  
63 al., 2000), and telomere recombination (Draskovic et al., 2009; Flynn et al., 2015).

64 Homozygous *Pml*<sup>-/-</sup> mice have been shown to exhibit leucopenia (Wang et al., 1998)  
65 and compromised innate defense (Lunardi et al., 2011). In contrast, the phenotypes of  
66 the *Pml*<sup>-/-</sup> mice during reproduction and the significance of PML in the meiosis of  
67 germ cells have not (to our knowledge) been as thoroughly studied, likely due to the  
68 normal fecundity of *Pml*<sup>-/-</sup> mice (Wang et al., 1998). Indeed, PML has been  
69 demonstrated to be dispensable for embryonic development, with *Pml*<sup>-/-</sup> embryos  
70 exhibiting increased resistance to acute oxidative stress compared to wild-type  
71 embryos (Niwa-Kawakita et al., 2017). These findings suggest that PML or PML-NBs  
72 play an accessory role in embryonic development. Although *Pml* mRNA is present in  
73 unfertilized mouse oocytes (Ebrahimian et al., 2010; Cho et al., 2011), the appearance  
74 of PML-NBs has not been reported, raising the possibility that *Pml* mRNA may be  
75 dormant (i.e., transcripts are stable and left untranslated). Alternatively, although  
76 PML-NBs are known to be ubiquitously distributed in adult organisms (Goddard et al.,  
77 1995; Bernardi and Pandolfi, 2003), PML protein may not be phase-separated in a  
78 manner sufficient to form PML-NBs in oocytes.

79 Mouse oocytes undergo growth in follicles until these cells are ready for  
80 hormone-dependent ovulation. In response to hormone signaling, fully grown  
81 germinal vesicle (GV) oocytes resume meiotic division characterized by GV  
82 breakdown (GVBD) and subsequent polar body extrusion before fertilization with

83 sperm (Racki and Richter, 2006). During oocyte growth at meiosis prophase I, as in  
84 interphase in somatic cells, the nucleus is surrounded by a nuclear membrane and  
85 includes actively transcribing, three-compartmented nucleoli (Fulka et al., 2020). As  
86 oocyte growth proceeds, non-membranous organelles dynamically change their  
87 characteristics and their fates. For instance, processing bodies (P-bodies) disappear  
88 early in oocyte growth, with some P-body components transiently forming subcortical  
89 aggregates (SCAs; storage compartments for maternal mRNAs) in GV oocytes (Flemr  
90 et al., 2010). Decreased transcription in oocytes results in a reduced number of  
91 enlarged nuclear speckles, which appear to retain unspliced pre-mRNAs (Ihara et al.,  
92 2008). The nucleolus loses sub-compartments upon gradual shutdown of rRNA  
93 synthesis, forming nucleolus-like bodies (NLBs) surrounded by heterochromatin in the  
94 nuclei of GV oocytes (Bouniol-Baly et al., 1999). These active fluxes of  
95 non-membranous organelles spatiotemporally regulate maternal RNA metabolism  
96 during oocyte growth.

97 Although the oocyte nucleus is an active region for phase-separated organelles, it  
98 remains unclear why oocytes are devoid of specific membrane-less organelles such as  
99 PML-NBs and Cajal bodies (Fulka and Aoki, 2016). The present study addressed the  
100 question of why the PML-NB-free intranuclear milieu of oocytes facilitates oocyte  
101 growth.

102

103 **Experimental Procedures**

104 *Chemicals, reagents, and antibodies*

105 Sodium arsenite (NaAsO<sub>2</sub>), Triton X-100, 3-isobutyl-1-methylxanthine (IBMX), and  
106 K-modified simplex optimized medium (KSOM) were purchased from Sigma (St.  
107 Louis, MO, USA). Paraformaldehyde (PFA), dimethyl sulfoxide (DMSO), bovine  
108 serum albumin (BSA), actinomycin D (AcD), and kanamycin were purchased from  
109 WAKO (Osaka, Japan). Pregnant mare serum gonadotropin (PMSG) and human  
110 chorionic gonadotropin (hCG) were purchased from Sigma and ASKA Pharmaceutical  
111 (Tokyo, Japan). Modified human tubular fluid (mHTF) medium was purchased from  
112 Kyudo (Saga, Japan). Carbobenzoxy-L-leucyl-L leucyl-L-leucinal (MG132) was  
113 purchased from Calbiochem (San Diego, CA, USA). Epoxomicin was purchased from  
114 Enzo Life Sciences (Farmingdale, NY, USA).  $\alpha$ -minimum essential media (MEM)  
115 medium, penicillin/streptomycin, and 4-(2-hydroxyethyl)-1-piperazineethanesulfonic  
116 acid (HEPES) were purchased from Gibco/Thermo Fisher Scientific (Grand Island,  
117 NY, USA). Lipofectamine LTX-Plus reagents, TOP10 competent cells, NuPAGE  
118 4-12% Bis-Tris gels, lithium dodecyl sulfate (LDS) sample buffer, Bolt™ WB  
119 systems, and MagicMark™XP size standards were purchased from Invitrogen/Thermo  
120 Fisher Scientific (Carlsbad, CA, USA). Mineral oil was purchased from Nacalai  
121 Tesque (Kyoto, Japan). ML-792 was purchased from MedKoo Biosciences  
122 (Morrisville, NC, USA). Hoechst dye was purchased from Dojin Chemical  
123 (Kumamoto, Japan). DNase was purchased from Ambion/Thermo Fisher Scientific  
124 (Carlsbad, CA, USA). Radioimmunoprecipitation (RIPA) lysis solutions (containing  
125 0.1% sodium dodecyl sulfate), protease inhibitor cocktail, phenylmethylsulfonyl

126 fluoride (PMSF), and sodium orthovanadate (SOV) were purchased from Santa Cruz  
127 Biotechnology (Santa Cruz, CA, USA). KOD-FX and KOD-plus Mutagenesis Kits  
128 were purchased from TOYOBO (Osaka, Japan). Fetal bovine serum (FBS) was  
129 purchased from Biowest (Nuaille, France). ECL<sup>TM</sup> Prime was purchased from GE  
130 Healthcare (Buckinghamshire, UK). The following antibodies were used in this study:  
131 anti- $\alpha$  thalassemia/mental retardation syndrome X-linked protein (ATRX), anti-death  
132 domain-associated protein (DAXX), anti-human PML (sc-966), Alexa 488-conjugated  
133 anti-SUMO2/3, anti-lamin B, horseradish peroxidase (HRP) -conjugated goat  
134 anti-mouse or -rabbit immunoglobulin G (IgG) (Santa Cruz Biotechnology),  
135 anti-human PML (A301-167A: Bethyl, Montgomery, TX, USA), anti-mouse PML  
136 (#05-718: Millipore), anti-SUMO1 (#4940), anti-survivin, anti-early endosome  
137 antigen 1 (EEA1) (Cell Signaling Technology, Danvers, MA, USA), anti-multi  
138 ubiquitin (Ub, #D058-3), anti-SUMO2/3 (#M114-3: MBL, Nagoya, Japan),  
139 anti-calcium-responsive transactivator (CREST) protein human antiserum (Immuno  
140 Vision, Springdale, USA), anti-synaptonemal complex protein 3 (SYCP3),  
141 anti-SUMO-conjugating enzyme (Ubc9), anti-proteasome 20S alpha 1+2+3+5+6+7  
142 (20S) (Abcam, Cambridge, UK), anti-70-kDa heat shock proteins (Hsp70)  
143 (StressMarq Biosciences, Victoria, Canada), anti-splicing component, 35 kDa (SC35)  
144 (S4045: Sigma), and Alexa 488-, 594-, or 647-conjugated secondary antibodies  
145 (Molecular Probes/Thermo Fisher Scientific). The #M114-3 clone of anti-SUMO2/3  
146 antibody also was used to generate additional Alexa 488-conjugated anti-SUMO2/3  
147 antibody, which was labeled using an Alexa Fluor<sup>TM</sup> 488 Antibody Labeling Kit  
148 (Molecular Probes/Thermo Fisher Scientific, Eugene, OR, USA)

149 *Collection and culture of oocytes, zygotes, and embryos*

150 All animal procedures and protocols were in accordance with the *Guidelines for the*  
151 *Care and Use of Laboratory Animals* (June 2021 edition) and were approved by the  
152 Animal Care and Use Committee of the National Institute for Environmental Studies  
153 (NIES) (Approval No. 21-002). C57BL/6J mice were purchased from CLEA-Japan  
154 (Kawasaki, Japan). The animals were housed under a 12-hr/12-hr light/dark cycle with  
155 free access to food and water. Unless otherwise mentioned, oocytes were cultured in  
156 medium for *in vitro* maturation (basal medium:  $\alpha$ -MEM medium supplemented with  
157 penicillin/streptomycin (100 units/mL and 100  $\mu$ g/mL, respectively) and  
158 heat-inactivated FBS (10%)). Actively transcribed and meiotically incompetent  
159 oocytes collected from postnatal days 12-16 are referred to as “maturing oocytes” in  
160 the present study. Subsets of oocytes in the ovary form follicles that then grow  
161 (folliculogenesis), a process that initiates just before birth and continues to postnatal  
162 days 22-24 (Racki and Richter, 2006; Rodriguez et al., 2019). The status of the  
163 full-sized oocytes remains arrested at meiotic prophase with a large nucleus, a  
164 structure that is designated the germinal vesicle (GV). The GV oocyte stage can be  
165 subdivided into the non- surrounded nucleolus (NSN) stage and the surrounded  
166 nucleolus (SN) stage based on maturity. The SN stage is characterized by a  
167 transcriptionally inactive heterochromatin rim (i.e., with heterochromatin surrounding  
168 the nucleolus-like body (NLB)), wherein the cell is primed for breakdown of nuclear  
169 membrane (GVBD), a hallmark of the resumption of meiosis. Except for the oocytes  
170 depicted in Fig. S1B-D (which represent samples collected directly from adult ovaries),  
171 Metaphase I (MI) and Metaphase II (MII) -stage oocytes were obtained by *in vitro*  
172 culture as follows. For collection of fully grown GV oocytes, follicles on the ovarian  
173 surface were mechanically ruptured with a pair of forceps. GV oocytes initially were



174 isolated in basal medium supplemented with HEPES (12.5 mM) and IBMX (0.1 mM);  
175 IBMX is a phosphodiesterase inhibitor that inhibits/controls spontaneous meiotic  
176 resumption. After IBMX was removed by washing with basal medium, oocytes were  
177 incubated for 4 hr to allow GVBD to proceed. Development of oocytes was further  
178 verified by observation of the extrusion of the first polar body (Pb1; a marker of  
179 MII-stage oocytes that have the potential to be fertilized with sperm) after an  
180 additional incubation of up to 16 hr. We regarded Pb1-free oocytes with no GV as  
181 MI-stage oocytes. To obtain embryos, female mice were initially primed by  
182 intraperitoneal injection of PMSG followed 48 hr later by injection with hCG.  
183 Superovulated oocytes were collected from the oviducts of euthanized mice by gently  
184 teasing apart of the ampulla with a 21-gauge needle (TERUMO, Tokyo, Japan) to  
185 release cumulus-oocyte complexes in mHTF medium; these oocytes then were  
186 inseminated with pre-capacitated sperm. To assess pronuclear (PN) stages after  
187 insemination, we evaluated fertilized oocytes based on the distance between the male  
188 and female pronuclei. PN stages were defined as follows: PN3, smaller pronuclei that  
189 are distributed distantly; PN5, bigger pronuclei that overlap. After fertilization,  
190 embryos were cultured further until the indicated embryonic stages or time points  
191 using KSOM medium. Cultures were performed in a drop of medium (30-80  $\mu$ L)  
192 under a mineral oil overlay at 37 °C in a humidified atmosphere of 5% CO<sub>2</sub>  
193 (APM-30D; ASTEC, Fukuoka, Japan), except for heat shock (HS) experiments, which  
194 were performed at 42 °C in ambient air (FMC-1000; EYELA, Tokyo, Japan).

195 *Western blot analysis for PML and SUMO in CHO-K1 cells*

196 Using Lipofectamine LTX-Plus reagents, CHO-K1 cells were transiently transfected  
197 with plasmids harboring *PmlVI* (human PML transcript variant 5, NM\_033244) or a  
198 cDNA encoding a SUMOylation-deficient version of the protein. The former construct,  
199 which we designated v5-hPMLVI, was obtained from OriGene (Rockville, MD, USA).  
200 The latter construct, which we designated v5-hPMLVI (K160, 490R), encodes a  
201 mutant version of the same protein in which the nucleic acid sequences encoding the  
202 K160 and K490 amino acid residues were altered to encode Arg residues (by mutation  
203 using the KOD-plus Mutagenesis Kit according to the manufacturer's instructions).  
204 The K160 and K490 residues correspond to sites known to be required for  
205 SUMOylation (Lallemand-Breitenbach et al., 2008). The transfected cells were  
206 washed with phosphate-buffered saline (PBS, pH 7.1-7.7) and then lysed on ice with  
207 100  $\mu$ L of RIPA lysis buffer pre-mixed with protease inhibitor cocktail (1:100,  
208 vol/vol), PMSF (a serine protease inhibitor; 2 mM), and SOV (a phosphatase inhibitor;  
209 1 mM). The lysate was centrifuged at 9,000 x g for 5 min at 4 °C and the resulting  
210 supernatant was designated as the RIPA-soluble fraction. The pellet was washed again  
211 with PBS and then treated with DNase (40 U/mL) to reduce the viscosity. Pellets were  
212 ruptured by ultrasonication at 4 °C for 30 min using a Bioruptor<sup>TM</sup> (UCD-250,  
213 H-amplitude, repeating 15-sec sonication at 45-sec intervals; Cosmobio, Tokyo,  
214 Japan) followed by a 1-hr incubation at 25 °C with intermittent vortexing using a  
215 thermomixer (Eppendorf, Wesseling-Berzdorf, Germany). Aliquots were designated as  
216 the RIPA-insoluble fraction and subsequently mixed with LDS sample buffer and  
217 boiled at 95 °C for 3 min before being stocked frozen at -30 °C. Before loading onto  
218 gels, samples again were boiled at 95 °C for 10 min. Proteins in the samples were  
219 resolved by LDS-polyacrylamide gel electrophoresis (LDS-PAGE) and electroblotted

220 to membranes; the membranes were blocked and then probed with primary antibodies  
221 overnight at 4 °C before hybridization with secondary antibodies for 1 hr at room  
222 temperature. Signals obtained with ECL<sup>TM</sup> Prime Chemiluminescent HRP Substrate  
223 were detected with an FAS1100 (TOYOBO).

#### 224 *Plasmid or mRNA microinjection*

225 The Emerald Green Fluorescent Protein (EmGFP) -encoding region from Vivid  
226 Colors<sup>TM</sup> cDNA pcDNA<sup>TM</sup>6.2/N-EmGFP-DEST Vector (Thermo Fisher Scientific)  
227 was placed upstream of the coding sequence of *PmlVI* (human PML transcript variant  
228 5, NM\_033244) as described previously (Hirano et al., 2018). The fusion protein  
229 encoded by the resulting construct was designated GFP-hPMLVI. Each plasmid,  
230 including v5-hPMLVI and v5-hPMLVI (K160, 490R), was diluted to a concentration  
231 of 5 ng/μL with Milli-Q water. mRNA preparation was conducted by BEX (Tokyo,  
232 Japan) by *in vitro* transcription from v5-hPMLVI or v5-hPMLVI (K160, 490R) using  
233 a HiScribe<sup>TM</sup> T7 ARCA mRNA Kit with tailing (New England Biolabs, Ipswich, MA,  
234 USA) and a MEGAclean<sup>TM</sup> Transcription Clean-Up Kit (Thermo Fisher Scientific).  
235 Each mRNA was diluted to a concentration of 25 or 100 ng/μL with RNase free water  
236 (Jena Bioscience, Jena, Germany). Each solution was loaded into a DNA injection  
237 pipette (TIP-DNA [LIC-OD1], NAKA Medical, Tokyo, Japan), and the pipettes were  
238 placed in an IM-9B microinjector (Narishige, Tokyo, Japan). MN-4 and MMO-202ND  
239 manipulators (Narishige) were adapted to an IX70 inverted microscope (Olympus,  
240 Tokyo, Japan) via NO-PIX-4-P (Narishige). Plasmid or mRNA solutions were injected  
241 into each oocyte nucleus or cytoplasm (respectively) until adequate swelling of the  
242 nuclear or plasma membrane (respectively) was observed. Injection was conducted in

243 the basal medium supplemented with HEPES (12.5 mM) and IBMX (0.1 mM).

244 Injected oocytes were washed and cultured without HEPES during the interval

245 indicated for each experiment.

#### 246 *Immunofluorescent (IF) staining*

247 Except for the live imaging of GV oocytes in Figure 2A, oocytes, zygotes, and

248 embryos at each indicated stage were fixed with 4% phosphate-buffered PFA (pH

249 7.0-7.4) at room temperature. Cells were permeabilized with 0.5% Triton X-100 in

250 PBS, blocked with 5% BSA-PBS, and then stained with the indicated primary

251 antibodies in 1% BSA-PBS. Cells were visualized with Alexa-conjugated secondary

252 antibodies; Hoechst dye was included to stain DNA. Cells were placed in small drops

253 (4  $\mu$ L each) of 1% BSA-PBS, covered with mineral oil, in a glass-bottomed 35-mm

254 petri dish (AGC techno glass, Shizuoka, Japan). Images were captured by confocal

255 microscopy (Leica TCS-SP5; Leica, Solms, Germany).

256 For the detection of nascently translated polypeptides, oocytes or embryos were

257 cultured with O-propargyl-puromycin (OP-puro) (obtained as part of a Click-iT<sup>®</sup> Plus

258 OPP Protein Synthesis Assay Kit; Molecular Probes/Thermo Fisher Scientific) at a

259 concentration of 20  $\mu$ M for the indicated time periods, followed by Click reaction

260 according to the manufacturer's instructions. Images were captured by confocal

261 microscopy.

262 As a reference for PML-NB staining, bone marrow from euthanized male C57BL/6J

263 mice was exposed by removing both ends of the femur; bone marrow cells then were

264 obtained by flushing the marrow with PBS using a 25-gauge needle (TERUMO). The

265 resulting cells were immediately cytocentrifuged onto slide glass and air-dried. The

266 cell preparations were used for immunostaining for visualization of endogenous  
267 PML-NBs. Images were captured by fluorescence microscopy (ECLIPSE 80i; Nikon,  
268 Tokyo, Japan).

#### 269 *Electron microscopic (EM) analysis*

270 GV oocytes were cultured for 20 hr. Metaphase oocytes were fixed in 4% PFA, 0.2%  
271 glutaraldehyde, and 0.5% tannic acid in 0.1 M cacodylate buffer, pH 7.4, for 100 min at  
272 room temperature. The fixed oocytes then were washed with 0.1 M cacodylate buffer.  
273 Further procedures were conducted by Tokai Electron Microscopy, Inc. (Nagoya, Japan).  
274 After dehydration, the sample was embedded in resin (LR White; London Resin,  
275 Berkshire, UK). The polymerized resin was ultra-thin sectioned at thicknesses of 80 nm,  
276 and the sections were mounted on nickel grids. The grids were incubated with the  
277 primary antibody (anti-mouse PML, #05-718) in 1% BSA-PBS overnight at 4 °C. The  
278 grid-mounted sections subsequently were incubated for 1 hr at room temperature with  
279 the secondary antibody conjugated to 20-nm gold particles (EMGMHL20; BBI  
280 Solutions, Crumlin, UK). Grids then were placed in 2% glutaraldehyde in 0.1 M  
281 cacodylate buffer. Subsequently, the grids were dried and stained with 2% uranyl acetate  
282 for 15 min, and then placed in lead staining solution (Sigma) at room temperature for 3  
283 min. The grids were observed by transmission electron microscopy (JEM-1400Plus;  
284 JEOL, Tokyo, Japan).

285

#### 286 *Data analysis*

287 Where indicated, data are presented as means with the standard error of the mean  
288 (SEM).

289 **Results**

290 *PML-NBs are not formed during development of oocytes*

291 To understand the location of PML protein in oocytes during and after the resumption  
292 of meiosis, GV oocytes were collected from ovaries and cultured *in vitro*. In the  
293 nucleus of GV oocytes, PML accumulated around chromatin near the nuclear  
294 membrane (**Fig. 1A; Fig. S2C**). The peri-chromosomal distribution of PML protein  
295 also was observed in oocytes in the GVBD, MI, and MII stages (**Fig. 1A**). Immuno-  
296 EM analysis (using anti-mouse PML primary antibody and gold-conjugated secondary  
297 antibody) revealed that gold particles (indicative of PML-positive staining) were  
298 localized peri-chromosomally as amorphous protein aggregate-like structures (**Fig.**  
299 **S1A**). IF analysis of PML, in combination with staining for a chromosomal passenger  
300 complex marker and a kinetochore marker, revealed that PML was arranged in a  
301 pattern extending from the kinetochores with localization along the chromosome arms  
302 (**Fig. S1B,C**). In contrast to mitotic assemblies of PML proteins (MAPPs), which are  
303 tethered to early endosomes in metaphase-stage somatic cells (Dellaire et al., 2006),  
304 PML in oocytes never co-localized with early endosomes (which themselves were  
305 labeled with anti-EEA1 antibodies, as assessed by IF) during metaphase (**Fig. S1D**).  
306 To examine the spatiotemporal distribution of PML protein, oocytes at various meiotic  
307 stages were collected. Among ovarian cells (55 of which were surveyed in detail)  
308 collected from postnatal day 1 mice, cells that stained positively for SYCP3 (a marker  
309 of germ cells in meiotic prophase) exhibited nuclear staining for PML just beneath the  
310 inner nuclear membrane; however, PML was not detected as nuclear bodies (NBs) in  
311 these cells (**Fig. 1B**). In contrast, NBs were seen in 98.1% of the 162 control (bone  
312 marrow) cells examined (**Fig. S1F**). Similarly, in the pronuclei of zygotes as well as

313 fertilized 2-cell embryos, PML protein was observed just beneath the inner nuclear  
314 membrane (**Fig. 1C**), where the heterochromatin is known to be enriched (Bersaglieri  
315 and Santoro, 2019). When a similar analysis was performed on zygotes, no NBs were  
316 observed in the nucleoplasm among the 32 zygotes that were surveyed, (**Fig. 1C**).  
317 During the development of preimplantation embryos, PML-NBs were unambiguously  
318 detected in the nucleus of each blastomere, at least in the morula to early blastocyst  
319 stage (**Fig. S1E**); In post-morula-stage embryos, PML also was slightly enriched  
320 beneath the nuclear membrane, as observed in 2-cell embryos (**Fig. 1C**). PML proteins  
321 in NBs exhibited co-localization with SUMO and with DAXX (**Fig. S1E**), which are  
322 representative clients of the PML-NBs (Lallemand-Breitenbach and de The, 2018).  
323 Thus, it appeared that oocyte PML is associated with the heterochromatin, a  
324 localization that is coordinated with the turnover of nuclear membrane in oocytes  
325 undergoing meiosis.

326

### 327 *The dynamics of nascent PML-NBs in the nucleoplasm demands SUMO*

328 To address if any possible advantages are present in the PML NB-free intranuclear  
329 milieu of oocytes during development, we attempted the deliberate assembly of NBs  
330 in the nuclei of GV oocytes. For concise interpretation, we injected a plasmid that  
331 encodes GFP-hPMLVI, a SUMO interaction motif (SIM) -free variant of PML,  
332 avoiding non-covalent interaction with SUMO or the SUMOylated moieties of  
333 modified proteins that often also contain SIMs. Despite a low success rate of  
334 expression (<10%), presumably due to the transcriptional quiescence of GV oocytes,  
335 injection of this construct resulted in the formation of NBs in the nuclei of GV oocytes

336 **(Fig. 2A)**. In these oocytes, exogenously formed GFP-hPMLVI-induced PML-NBs  
337 did not exhibit colocalization with either the endogenous ATRX or DAXX **(Fig. 2B)**,  
338 which are known clients of PML-NBs (Lallemand-Breitenbach and de The, 2018). In  
339 contrast, GFP-hPMLVI-induced PML-NBs exhibited colocalization with endogenous  
340 SUMO2/3 in a manner that depended on the degree of NB formation. This dependency  
341 also was observed in actively transcribing oocytes obtained from mice at  
342 approximately postnatal day 12-16 (i.e., maturing oocytes that are meiotically  
343 incompetent (De La Fuente, 2006)) **(Fig. 2C)**. A higher efficiency of plasmid  
344 expression (reaching >70%) was obtained in these maturing oocytes than in GV  
345 oocytes. Notably, in the presence of arsenite, even the faintly visible nascent  
346 GFP-hPMLVI-induced PML-NBs efficiently sequestered SUMO **(Fig. 2D)**. Given the  
347 observed tight association between GFP-hPMLVI-induced PML-NBs and SUMO, we  
348 next assessed the effects of PML-NB formation on molecules involved in the  
349 SUMOylation-triggered PML catabolism and nuclear stress responses. Although it has  
350 been reported that ubiquitin and proteasomes are recruited to SUMOylated PML when  
351 exposed to arsenic (Lallemand-Breitenbach et al., 2008), these two molecules and a  
352 related chaperone were not recruited to GFP-hPMLVI-induced PML-NBs **(Fig. 2E)**.  
353 Other than the nucleolus, PML-NB also has been reported to act as overflow  
354 compartments for misfolded proteins, a process that occurs under conditions of  
355 proteotoxic stress and is mediated by the ubiquitin-proteasome system upon in the  
356 nuclei of cultured somatic cells (Uozumi et al., 2016; Mediani et al., 2019). The  
357 relative paucity of the compartments dealing with the proteinous wastes could be a  
358 disadvantage for, PML-NB-free, the oocyte. In practice, we showed that aberrant  
359 polypeptides (generated in the presence of the proteasome inhibitor MG132), which



360 were labeled with an analog of puromycin (OP-puro), accumulated only in the  
361 nucleolus, and never in GFP-hPMLVI-induced PML-NBs (**Fig. 2F; Fig. S2A**).  
362 Similarly, in post-morula-stage embryos under proteotoxic stress, OP-puro-labeled  
363 aberrant polypeptides did not accumulate in endogenously appearing PML-NBs (**Fig.**  
364 **S2B**). Together, these results suggested that oocyte nucleoplasm can accommodate  
365 PML-NBs that preferentially sequester SUMO.

366 We next used the deliberate assembly of PML-NBs to more thoroughly analyze  
367 SUMO availability in maturing oocytes. First, oocytes were manipulated to limit the  
368 availability of SUMO with which PML could interact. Specifically, we injected  
369 oocytes with a construct (v5-hPMLVI (K160, 490R)) that encodes a mutated SIM-free  
370 variant of PML that has decreased SUMOylation efficiency, thereby decreasing the  
371 protein's avidity for SUMO and the SIM moiety of SUMOylated proteins (**Fig. S3A**).  
372 We found that oocytes injected with plasmid v5-hPMLVI (K160, 490R) exhibited a  
373 decreased number ( $2.22 \pm 0.36$  (mean  $\pm$  SEM), across 12 oocytes) of enlarged  
374 v5-hPMLVI (K160, 490R) -induced PML-NBs compared to the dozens observed in  
375 oocytes injected with the wild-type PMLVI-encoding plasmid (**Fig. 3A,B**). In the  
376 v5-hPMLVI (K160, 490R) -injected oocytes, SUMO protein accumulated with the  
377 v5-hPMLVI (K160, 490R) -induced PML-NBs, but did not merge with the PML  
378 (K160, 490R) shell of the NB, as if the SUMO protein were physically isolated within  
379 the PML-negative inner core (**Fig. 3B**). While arsenite efficiently promotes  
380 SUMOylation of PML, the SUMOylation-deficient mutant of PML has been reported  
381 to remain biochemically responsive to arsenite (Lallemand-Breitenbach et al., 2001).  
382 We first confirmed this observation by showing (using our system) that arsenite  
383 induces a sharp decline in the solubility (which favors *de novo* phase separation

384 (Banani et al., 2017)) of v5-hPMLVI (K160, 490R) -encoded protein, similar to that  
385 seen with the wild-type v5-hPMLVI -encoded protein (**Fig. S3B**). In oocytes injected  
386 with the plasmid v5-hPMLVI, arsenite treatment altered the spatial relationships  
387 between PML and SUMO from co-localization (**Fig. 3A**) to spherical co-layering (**Fig.**  
388 **3C**). In contrast, we observed the nascent formation of small-dot structures upon  
389 arsenite treatment in the v5-hPMLVI (K160, 490R) -injected oocytes (**Fig. 3D#1,#2,**  
390 **arrows**), and found that these structures frequently were clustered (**Fig. 3D#2,**  
391 **asterisks**). Notably, partial scaffolding of SUMO within the inner cores of  
392 v5-hPMLVI (K160, 490R) -induced PML-NBs assumed crooked shapes, presumably  
393 indicating partial SUMOylation of the v5-hPMLVI (K160, 490R) -encoded protein  
394 (**Fig. 3D#1,#2, arrowheads**).

395 Next, to understand the clustering of the nascent v5-hPMLVI (K160, 490R) -induced  
396 PML-NBs, we treated maturing oocytes with ML-792 (an inhibitor of a  
397 SUMO-activating enzyme) to limit the nucleoplasmic availability of SUMO (He et al.,  
398 2017). Compared to the nuclei of maturing oocytes treated with vehicle, the nuclei of  
399 maturing oocytes treated with ML-792 lacked general staining with anti-SUMO1  
400 antibody, exhibiting staining only at the nuclear membrane (**Fig. 3E**). Maturing  
401 oocytes injected with the GFP-PML-encoding plasmid and cultured in the presence of  
402 ML-792 exhibited a decreased number ( $1.96 \pm 0.18$ ; 27 oocytes cultured for a shorter  
403 period of 22 hr were quantified) of GFP-hPMLVI-induced PML-NBs that clustered  
404 together (**Fig. 3F**). Collectively, these results suggested that maturing oocytes  
405 maintain the dynamics of PML-NBs at the cost of SUMO availability in the  
406 nucleoplasm.

407 *PML-NBs potentially affect the efficiency of the response of SUMO mediated by liquid*  
408 *droplet formation upon exposure to multiple stresses*

409 We noticed that in maturing oocytes, a portion of the SUMO signal was detected as  
410 small drops (**Fig. 4A**) in the nucleolus, which is itself a droplet formed by liquid-liquid  
411 phase separation (Feric et al., 2016). Transcriptional inhibition with actinomycin D  
412 (AcD), an inducer of a nucleolar stress response (Sundqvist et al., 2009), resulted in  
413 dispersion of SUMO drops within the nucleoplasm (**Fig. 4A**). The  
414 nucleoplasm-localized SUMO signal following AcD exposure was sequestered by  
415 GFP-hPMLVI-induced PML-NBs (**Fig. 4B**). These results suggested that formation of  
416 PML-NBs in transcriptionally active maturing oocytes potentially impedes the  
417 SUMOylation typically seen as part of the nucleolar stress response.

418 SUMO localized primarily in the nucleoplasm, with several depositions at sites of  
419 condensed DNA (i.e., heterochromatin) in vehicle-treated NSN-stage GV oocytes (**Fig.**  
420 **4C, arrowheads**). During an examination of the effects of various types of proteotoxic  
421 stress on oocytes (**Fig. 2F; Fig. S2A**), we noticed that upon heat shock (HS;  
422 incubation at 42 °C for 2 hr), SUMO delocalized and exhibited co-localization with  
423 SC35 (a marker of nuclear speckles) -positive droplets (**Fig. 4C, NSN**). In  
424 vehicle-treated SN-stage oocytes, SUMO was highly enriched along the  
425 heterochromatin rim (**Fig. 4C, arrow**), while SC35-positive droplets disappeared.  
426 Upon HS, the SUMO signal formed SUMO droplets that tightly co-localized with  
427 SC35-positive droplets (**Fig. 4C, NSN-SN and SN**). In other experiments, we treated  
428 maturing oocytes with proteasome inhibitors for prolonged intervals. Exposure of  
429 maturing oocytes to MG132 for 39 hr (**Fig. 4D; Fig. S4A**) or to epoxomicin for 45 hr

430 **(Fig. S4D)** resulted in the formation of large SUMO droplets that co-localized with  
431 SC35-positive droplets, consistent with the results of the HS experiments. We next  
432 tested the effect of deliberate assembly of PML-NBs on the response to proteotoxic  
433 stressors, taking into consideration the observation (data not shown) that GV oocytes  
434 were resilient to HS compared to maturing oocytes (in which the whole cells were  
435 easily distorted). However, we were unable to obtain assembly of PML-NBs in GV  
436 oocytes by injecting *hPMLVI* mRNA (a highly effective method for driving gene  
437 expression, used here as an alternative to plasmid injection) unless the recipient  
438 oocytes were exposed to additional stimuli **(Fig. S3C,D)**. Accordingly in maturing  
439 oocytes, when the exposure to a proteotoxic stressor was conducted after deliberate  
440 assembly of PML-NBs by the injection of the GFP-*hPMLVI*-encoding plasmid,  
441 SUMO was sequestered not with SC35-positive droplets but with  
442 GFP-*hPMLVI*-induced PML-NBs **(Fig. 4E)**. When considered together with the data  
443 indicating that assembled PML-NBs in oocytes are not involved in the regulation of  
444 misfolded proteins upon proteotoxic stress **(Fig. 2F; Fig. S2A,B)**, these results  
445 suggested that nascent PML-NBs in the nucleoplasm indirectly affect the efficiency of  
446 the SUMO response that is mediated by liquid droplet formation upon exposure to  
447 stressors.

448

449 **Discussion**

450 We conjecture that if PML proteins were phase separated to form NBs in the  
451 nucleoplasm of oocytes, the available SUMO would be preferentially used for the  
452 maintenance of the dynamics of nascent PML-NBs. We tested this hypothesis by  
453 modifying the availability of SUMO in the nucleoplasm, both from the PML and  
454 SUMO sides. The limited number of enlarged v5-hPMLVI (K160, 490R) -induced  
455 PML-NBs (**Fig. 3B**) was consistent with previous work, including studies (a)  
456 conducted in cultured cells expressing PML mutant proteins harboring the K65A  
457 mutation (K65 is another residue involved in SUMOylation, via a process that is  
458 tightly coupled to K160 SUMOylation) (Lallemand-Breitenbach et al., 2008); (b)  
459 testing PML-NBs in SUMO mutant-transfected cells that are deficient in SUMO  
460 conjugation or polymerization (Fu et al., 2005); and (c) in SUMO-conjugating enzyme  
461 (*Ubc9*) -deficient blastocysts (Nacerddine et al., 2005). A recent study employing  
462 polymer physics proposed a model for the organization of paraspeckle, another  
463 core-shell type nuclear body. That report showed that parts of the building domains of  
464 the resident (long non-coding RNAs) are mutually repulsive when positioned at the  
465 surface of paraspeckle, which accordingly determines the dynamics (size, number, and  
466 distribution) of the nuclear body; however, these repulsive domains are not required  
467 for the assembly of paraspeckle itself (Yamazaki et al., 2021). Notably, SUMOylation  
468 is dispensable for the formation of PML-NBs (Sahin et al., 2014). As shown in the  
469 wild-type v5-hPMLVI -injected oocytes (**Fig. 3C**), arsenite treatment induces rapid  
470 polymerization of SUMO chains on insolubilized PML (**Fig. S3B**) at the shell, such  
471 that the structure formed spherical co-layer; this observation suggested that the  
472 structure was dominated by minimization of surface tension. The crooked-shaped

473 shells (**Fig. 3B**), which are composed of mutant PML whose avidity for SUMO is  
474 limited, may indicate that the availability of SUMO in the oocyte nucleoplasm is one  
475 of the determinants of the surface property (facing the nucleoplasm) of nascent  
476 PML-NBs. Tight sequestration of SUMO molecules into the PML-negative inner core  
477 (as observed in the v5-hPMLVI (K160, 490R) -injected oocytes) is reminiscent of the  
478 sequestration of the profluorescent biarsenical dye  
479 4,5-bis(1,3,2-dithiarsolan-2-yl)fluorescein (FIAsH) in the cores of C212/213A-arsenic  
480 binding site mutants (Jeanne et al., 2010), and is deserving of further study. In the  
481 present work, we utilized a chemical (ML-792) to deplete the availability of SUMO in  
482 the nucleoplasm based on a mechanism of covalent SUMO-ML-792 adduct formation  
483 within the SUMO E1 enzyme (Brownell et al., 2010; He et al., 2017). We found that  
484 newly assembled GFP-hPMLVI-induced PML-NBs frequently cluster together in  
485 maturing oocytes cultured in the presence of ML-792 (**Fig. 3F**). This aberrant  
486 tethering would mechanistically relate (at least in part) to the clustering of nascent  
487 v5-hPMLVI (K160, 490R) -induced PML-NBs in the nucleoplasm upon arsenite  
488 treatment (**Fig. 3D#2**), namely arsenite-dependent boosting of SUMOylation may  
489 anyhow be attempted on mutated PML, which has little avidity for SUMO. These  
490 results suggested that a NB-free intranuclear milieu is beneficial for maturing oocytes,  
491 enhancing the availability of SUMO molecules during oocyte maturation.

492 Three SUMO isoforms (SUMO1, 2, and 3) are expressed ubiquitously in mammals.  
493 SUMO2 is the major isoform expressed in embryogenesis; *Sumo2*-deficient mice die  
494 at approximately embryonic day 10.5 (Wang et al., 2014). In contrast, neither SUMO1  
495 nor SUMO3 is essential for embryogenesis. There are three distinct steps to  
496 SUMOylation; Ubc9, the sole enzyme required for the second reaction, also is

497 indispensable for embryogenesis. Like embryos lacking SUMO2, *Ubc9*-deficient  
498 embryos die during embryogenesis, at approximately embryonic day 3.5-7.5, that is,  
499 just after implantation (Nacerddine et al., 2005). Mice harboring an oocyte-specific  
500 knockout of the *Ubc9*-encoding gene (*Ube2i-cKO*) show infertility with complete  
501 failure of oocytes to extrude the polar bodies (but no aberrancy in spindle  
502 morphology) (Rodriguez et al., 2019), supporting the notion that SUMOylation is  
503 critical for regulation of molecules involved in the MI-MII transition (Wang et al.,  
504 2010; Yuan et al., 2014; Ding et al., 2018). As has been suggested previously (Ihara et  
505 al., 2008), the *Ube2i-cKO* study indicates that the SUMOylation pathway is required  
506 not only for the resumption of meiosis but also for processes that begin before the GV  
507 stage. Since in the *Ube2i-cKO* study, Rodriguez et al. used a *Gdf-9 Cre* promoter as a  
508 driver (i.e., *Ube2i* deletion would have begun at approximately postnatal day 3), the  
509 observed dysfunction of gonadotropin-primed GV oocytes collected from 3-week-old  
510 mice implies that SUMOylation is required for a step occurring during folliculogenesis,  
511 during which oocytes undergo maturation. Although the specific relevant targets of  
512 SUMOylation currently are unknown, this previous literature suggests the significance  
513 both of SUMOylation and of SUMO availability in the nucleoplasm of maturing  
514 oocytes.

515 Individual maturing oocytes with maximum transcriptional activity collected from  
516 approximately postnatal day 14 gradually achieve a transcriptionally silent state,  
517 rendering these cells meiotically competent SN-type GV oocytes (De La Fuente, 2006).  
518 SN-type GV oocytes are observed from at least postnatal day 16-17 in mice and  
519 increase in proportion with mouse age (Bouniol-Baly et al., 1999; Inoue et al., 2007).  
520 Following global transcriptional repression, oocytes undergo chromosomal

521 reconfiguration around the nucleolus to acquire the full competence to become  
522 embryos. These two events are coordinated in time, but occur independently of each  
523 other, given that *nucleoplasmin 2 (Npm2)* -null oocytes (which fail to remodel the  
524 chromosomal configuration) still show global transcriptional repression (De La Fuente  
525 et al., 2004), and given that *mixed lineage leukemia 2 (Mll2)* -null oocytes (which  
526 show a normal chromosomal configuration) fail to repress transcriptional activity  
527 adequately (Andreu-Vieyra et al., 2010). Oocytes mutated in these genes suffer  
528 multiple insufficiencies that affect subsequent development, suggesting that accurate  
529 regulation of these events is vital for oocyte/embryo development. In the present study,  
530 we found that SUMO, especially SUMO1, was detected as small drops in droplet (the  
531 nucleolus) of fresh maturing oocytes in which active ribosomal biogenesis involving  
532 rDNA transcription was occurring. Even though global transcriptional repression is  
533 essential for development, data from exogenously assembled PML-NBs (induced by  
534 injection of a plasmid encoding GFP-hPMLVI) revealed that the SUMO response to  
535 AcD was impaired in such injected cells. These results suggested that, in normal  
536 oocytes devoid of PML-NBs, SUMO molecules evade sequestration by PML-NBs;  
537 this reserve of available SUMO is beneficial in case of the sudden quiescence of  
538 transcription (i.e., prematurity).

539 SUMO forms large droplets with SC35-positive droplets upon exposure to proteotoxic  
540 stressors. Although the droplet formation upon HS appears to accompany the arrest of  
541 enrichment of SUMO along the heterochromatin rim in SN-type GV oocytes (**Fig. 4C**;  
542 also note **Fig. S2C** showing heterochromatin rim in normal SN-type GV oocytes), the  
543 significance of this phenomenon remains to be determined. Whereas the enlargement  
544 of SC35-positive nuclear speckles also was observed in transcriptional repression (**Fig.**



545 **S4C**), the SUMO dispersion in response to AcD (**Fig. 4A**), as well as the response of  
546 Ubc9 to MG132 (dissimilarly to the response to AcD) (**Fig. S4B,C**, respectively),  
547 indicated that SUMO-SC35 droplet formation upon MG132 treatment is likely  
548 independent of transcriptional repression. Together, these results suggested that  
549 SUMO, in normal oocytes devoid of PML-NBs, is involved in the acquisition of  
550 meiotic competence and participates in the emergency response to multiple stresses.  
551 Notably, the large droplets of SUMO and SC35 were no longer observed in embryos  
552 exposed to HS at approximately the early blastocyst stage, when endogenous  
553 PML-NBs emerge (**Fig. S4E**). We therefore predict that oocytes should exhibit an  
554 interval until the endogenous PML-NB emergence following the completion of oocyte  
555 development.

556 In conclusion, the present study demonstrated time-course-related links of PML  
557 protein to heterochromatin in the development of oocytes, during which PML does not  
558 engage in phase separation to form NBs. The PML-NB-free intranuclear milieu of  
559 oocytes reflects the significance of the reserve of SUMO available for emergent  
560 responses. The insights described here are expected to enhance our understanding of  
561 how the dynamics of membrane-less organelles contributes to cellular events and to  
562 responses to developmental cues.

563

#### 564 **Acknowledgments**

565 The authors thank Dr. Mounira K. Chelbi-Alix, Dr. Kenji Miyado, Dr. Azusa Inoue,  
566 and Dr. Satoshi Tsukamoto for helpful discussions. This work was supported, in part,  
567 by a Grant-in-Aid from the Japan Society for the Promotion of Science (JSPS Grant

568 No. 16K15386, to S.H.) and research funding from the National Institute for

569 Environmental Studies (NIES Grant No. 1620AQ026, to O.U.).

570

571 **Author Contributions**

572 O.U. performed all experiments, with assistance from A.K-U. O.U. designed the

573 project, analyzed data, prepared figures, and wrote the manuscript. S.H. supervised the

574 project and wrote the manuscript.

575

576 **Declaration of Interests**

577 The authors declare they have no actual or potential competing financial interests.

578

579 **Figure legends**

580

581 **Fig. 1. Promyelocytic leukemia (PML) nuclear bodies (PML-NBs) are not formed**  
582 **during oocyte development.** (A) Subcellular localization of endogenous PML in  
583 oocytes during and after meiotic resumption. Germinal vesicle (GV) oocytes were  
584 cultured to obtain metaphase II (MII) -stage oocytes. Breakdown of the nuclear  
585 membrane (GV breakdown; GVBD), a hallmark of meiotic resumption, was evaluated  
586 by stereomicroscopy during culturing and verified by staining with anti-lamin B  
587 antibody (green). PML was visualized by staining with anti-mouse PML (mPML, red)  
588 antibody. BF, bright-field images of the oocytes. Scale bars, 20  $\mu$ m. (B) Representative  
589 image of endogenous PML in oocytes collected from mice at postnatal day 1. The insets  
590 show separate images for each channel. Scale bars, 4.98  $\mu$ m. (C) Representative images  
591 of endogenous PML in zygotes at the indicated pronuclear (PN) stages just after  
592 fertilization. The image of the pronuclear stage 5 (PN5) zygote was reconstructed as a  
593 z-stack image. The inner nuclear membrane of the 2-cell embryo also was co-labeled  
594 with anti-lamin B antibody fluorescing in a different color. BF, bright-field images of  
595 the zygotes and the embryo. Scale bars, 20.1 and 20.2  $\mu$ m, respectively.

596

597 **Fig. 2. Characterization of nuclear bodies (NBs) deliberately assembled in the**  
598 **nuclei of oocytes.** (A) Representative z-stack image of exogenously formed PML-NBs  
599 in a germinal vesicle (GV) oocyte, a model to gain insight into the benefit of a NB-free  
600 intranuclear milieu in oocytes. Briefly, GV oocytes were injected with a plasmid  
601 harboring an Emerald Green Fluorescent Protein (EmGFP) -encoding sequence  
602 upstream of the sequence of *PmlVI* (human PML transcript variant 5, NM\_033244),

603 and cultured for 53 hr. The resulting encoded protein was designated GFP-hPMLVI. BF,  
604 bright-field image of the oocyte. Scale bars, 19.9  $\mu\text{m}$ . (B) Representative images of  
605 exogenously formed GFP-hPMLVI-induced PML-NBs and of representative PML-NB  
606 markers in GV oocytes.  $\alpha$  thalassemia/mental retardation syndrome X-linked protein  
607 (ATRX) and death domain-associated protein (DAXX) are representative clients of  
608 PML-NBs. Oocytes were visualized by immunofluorescent staining with anti-human  
609 PML antibody and by co-staining with anti-ATRX (red, left) or -DAXX (red, right)  
610 antibodies. Scale bars, 2.49 and 1.84  $\mu\text{m}$ , respectively. (C) Representative images of  
611 GFP-hPMLVI-induced PML-NBs in the nuclei of actively transcribing maturing  
612 oocytes; actively transcribing maturing oocytes were used to obtain a higher efficiency  
613 of plasmid expression. Maturing oocytes were injected with a plasmid encoding  
614 GFP-hPMLVI and cultured for 26.5 hr. Oocytes were stained with anti-human PML  
615 (green) and anti-SUMO1 (red) antibodies. (#1) While GFP-hPMLVI-induced  
616 PML-NBs were formed, a lower degree of SUMO sequestration was observed. (#2)  
617 GFP-hPMLVI-induced PML-NBs were fully formed and SUMO was well sequestered.  
618 Scale bars, 5.03  $\mu\text{m}$ . (D) Representative z-stack image of the nucleus of a maturing  
619 oocyte injected with the plasmid encoding GFP-hPMLVI and cultured for 24 hr  
620 followed by treatment with 3  $\mu\text{M}$  arsenite (As) for 2.5 hr. Oocytes were stained with  
621 anti-human PML (green) and anti-SUMO1 (red) antibodies. Note the intensive  
622 sequestration of SUMO, even by the faintly visible GFP-hPMLVI-induced PML-NBs.  
623 Scale bars, 5.03  $\mu\text{m}$ . (E) Representative image of the nucleus of a maturing oocyte  
624 injected with the plasmid encoding GFP-hPMLVI and cultured for 49.5 hr, then either  
625 treated with 3  $\mu\text{M}$  arsenite or left untreated for another 2.5 hr. Oocytes were stained  
626 with anti-multi ubiquitin (Ub), anti-proteasome 20S alpha 1+2+3+5+6+7 (20S), and

627 anti-70-kDa heat shock protein (Hsp70) (red) antibodies. Scale bars, 2.00  $\mu\text{m}$ . (F) An  
628 examination of whether GFP-hPMLVI-induced PML-NBs act as overflow  
629 compartments for misfolded proteins. Representative image of the nucleus of a  
630 maturing oocyte injected with the plasmid encoding GFP-hPMLVI and cultured for 50  
631 hr before labeling of newly synthesized aberrant polypeptides with an analog of  
632 puromycin (OP-puro, 20  $\mu\text{M}$ ) (red) combined with proteasome inhibitor (MG132, 10  
633  $\mu\text{M}$ ) for 30 min or 4 hr. Scale bars, 2.00  $\mu\text{m}$ .

634

635 **Fig. 3. The dynamics of nascent PML-NBs in the nucleoplasm demands SUMO.** (A  
636 and B) Representative images of the nuclei of maturing oocytes injected with plasmid  
637 v5-hPMLVI (encoding wild-type human PMLVI) (A, z-stack) or plasmid v5-hPMLVI  
638 (K160, 490R) (encoding a human PML VI that has limited avidity for SUMO) (B,  
639 z-stack) and cultured for 45 hr or 43 hr, respectively. Oocytes were stained with  
640 anti-human PML (green) and anti-SUMO1 (red) antibodies. (B, inset) Merged images  
641 with Hoechst staining of (B). Scale bars, 2.00  $\mu\text{m}$ . (C) Representative image of the  
642 nucleus of a maturing oocyte injected with plasmid v5-hPMLVI and cultured for 21 hr  
643 followed by treatment with 3  $\mu\text{M}$  arsenite (As) for 3 hr. Scale bars, 2.00  $\mu\text{m}$ . Enlarged  
644 images of the inset with diameter information. Scale bars, 1.00  $\mu\text{m}$ . (D) Representative  
645 images of the nuclei of maturing oocytes injected with plasmid v5-hPMLVI (K160,  
646 490R) and cultured for 47 hr (D#1 and 2, z-stack) followed by treatment with 3  $\mu\text{M}$   
647 arsenite for 3 hr. Oocytes were stained with anti-human PML (green) and anti-SUMO1  
648 (red) antibodies. Scale bars, 2.00  $\mu\text{m}$ . Arrows, nascent v5-hPMLVI (K160, 490R)  
649 -induced PML-NBs upon arsenite treatment; arrowheads, enlarged v5-hPMLVI (K160,  
650 490R) -induced PML-NBs and partial scaffolding of SUMO within the inner cores of

651 v5-hPMLVI (K160, 490R) -induced PML-NBs; asterisks, nascent v5-hPMLVI (K160,  
652 490R) -induced PML-NBs that frequently are clustered upon arsenite treatment. (E)  
653 Representative z-stack images of the nuclei of maturing oocytes treated with dimethyl  
654 sulfoxide (DMSO, vehicle control) or with 20  $\mu$ M ML-792, an inhibitor of a  
655 SUMO-activating enzyme limiting the nucleoplasmic availability of SUMO, for 4.5 hr.  
656 Oocytes were stained with anti-SUMO1 antibody. (F) Representative z-stack images of  
657 maturing oocytes injected with a plasmid encoding GFP-hPMLVI and cultured in the  
658 presence of 20  $\mu$ M ML-792 for 47 hr. Oocytes were stained with anti-human PML  
659 (green) antibody. Enlarged images of GFP-hPMLVI-induced PML-NBs that clustered  
660 together are shown on the right. BF, bright-field image of the oocytes. Scale bars, 19.9  
661  $\mu$ m (insets #1 to #4, 2.03  $\mu$ m).

662

663 **Fig. 4. PML-NBs potentially affect the efficiency of the response of SUMO**  
664 **mediated by liquid droplet formation upon exposure to multiple stresses.** (A)  
665 Representative images of the nuclei of maturing oocytes left untreated (cont) or treated  
666 with 1  $\mu$ M actinomycin D (AcD), a transcriptional inhibitor, for 20 hr. Oocytes were  
667 stained with Alexa 488-conjugated anti-SUMO2/3 antibody. (B) Representative image  
668 of the nucleus of a maturing oocyte injected with a plasmid encoding GFP-hPMLVI and  
669 cultured for 26 hr followed by treatment with 1  $\mu$ M AcD for 21 hr. The oocyte was  
670 stained with anti-SUMO2/3 antibody (red). (C) Representative images of the nuclei of  
671 GV oocytes cultured for 17 hr and then left untreated (cont) or subjected to heat shock  
672 at 42  $^{\circ}$ C for 2 hr. NSN; non-surrounded nucleolus stage, SN; surrounded nucleolus stage.  
673 Arrowheads indicate SUMO deposition at sites of condensed DNA in NSN-oocytes.  
674 Arrow indicates the heterochromatin rim in SN-oocytes. Oocytes were stained with

675 anti-splicing component, 35 kDa (SC35) (red) and Alexa 488-conjugated  
676 anti-SUMO2/3 (green) antibodies. Scale bars, 2.00  $\mu\text{m}$ . (D) Representative images of  
677 the nuclei of maturing oocytes cultured for 26 hr and then left untreated (cont) or  
678 subjected to treatment with 10  $\mu\text{M}$  MG132 for 39 hr. Prolonged exposure to proteasome  
679 inhibitors is proteotoxic to oocytes. Oocytes were stained with anti-SUMO1 (green) and  
680 anti-SC35 (red) antibodies. Scale bars, 2.02  $\mu\text{m}$ . (E) An examination of whether  
681 exogenously assembled PML-NBs alter the response of SUMO to proteotoxic stress.  
682 Representative image of the nucleus of a maturing oocyte injected with a plasmid  
683 encoding GFP-hPMLVI and cultured for 25 hr followed by treatment with 10  $\mu\text{M}$   
684 MG132 for 37 hr. Oocytes were stained with anti-SUMO1 (magenta) and anti-SC35  
685 (red) antibodies. Scale bars, 2.00  $\mu\text{m}$ .

686

687 **Fig. S1, related to Fig. 1. Subcellular localization of endogenous PML in**  
688 **metaphase-stage oocytes.** (A) Representative electron micrograph image of  
689 peri-chromosomal localization of endogenous PML visualized with primary anti-mouse  
690 PML (mPML) antibody and gold particle-conjugated (Gold) secondary antibody.  
691 Germinal vesicle (GV) oocytes were cultured *in vitro* for 20 hr. A magnified electron  
692 micrograph is shown on the right. (B-D) Representative fluorescent images of oocytes  
693 collected from the ovaries of adult mice. The chromosome arm of the metaphase II  
694 (MII) -stage oocyte (B, z-stack), the kinetochore of the GV breakdown (GVBD)-  
695 metaphase I (MI) -stage oocyte (C, z-stack), and the early endosome of the MII-stage  
696 oocyte (D) were labeled with anti-survivin antibody, calcium-responsive transactivator  
697 (CREST) antiserum, and anti-early endosome antigen 1 (EEA1) antibody, respectively.  
698 BF, bright-field image of the oocyte. (E) Representative image of an embryo at

699 approximately the early blastocyst stage. (Upper) Subcellular localization of  
700 endogenous PML (red) and SUMO2/3 (green). Scale bars, 975 nm. (Lower)  
701 Co-localization of SUMO2/3 (green) with DAXX (red), a representative client of  
702 PML-NBs. Images were reconstructed as z-stack images. Scale bars, 20.2  $\mu$ m. (F)  
703 Representative image of endogenous PML-NBs (red) in control bone marrow-derived  
704 cells.

705

706 **Fig. S2, related to Fig. 2. An examination of whether exogenously assembled and**  
707 **endogenously appearing PML-NBs act as overflow compartments for misfolded**  
708 **proteins.** (A) Representative image of the nucleus of a maturing oocyte injected with a  
709 plasmid encoding GFP-hPMLVI and cultured for the indicated time. Before the end of  
710 culturing, newly synthesized aberrant polypeptides were labeled with 20  $\mu$ M OP-puro  
711 (red) combined with 100  $\mu$ M MG132 for the indicated time. BF, bright-field images of  
712 the oocytes. Scale bars, 2.00  $\mu$ m. (B) (Left) Representative image of an embryo cultured  
713 for 76 hr before labeling of newly synthesized aberrant polypeptides with 20  $\mu$ M  
714 OP-puro (red) combined with 10  $\mu$ M MG132 for 4 hr (80 hr post-insemination, 80  
715 h.p.i.). Endogenously appearing PML-NBs in the nucleus of each blastomere at the  
716 morula to early blastocyst stage were visualized by immunofluorescent staining with  
717 anti-mouse PML (mPML, green) antibody. BF, bright-field image of the embryo. Scale  
718 bars, 19.9  $\mu$ m. (Right) Enlarged images of the nuclei of representative blastomeres.  
719 Scale bars, 2.00  $\mu$ m. (C) Representative image of the nucleus of a germinal vesicle  
720 (GV) oocyte treated with dimethyl sulfoxide (DMSO, vehicle control) for 24 hr.  
721 Endogenous PML was visualized by staining with anti-mouse PML (mPML, red)  
722 antibody. The oocyte was further stained with Alexa 488-conjugated anti-SUMO2/3



723 antibody.

724

725 **Fig. S3, related to Fig. 3. Preparations for modifying the SUMO availability in**

726 **oocytes.** (A) Schematic domain structures of wild-type human PMLVI and a mutant

727 version of the same protein that has limited avidity for SUMO; these proteins were

728 encoded by the plasmids v5-hPMLVI and v5-hPMLVI (K160, 490R), respectively.

729 RING: Really Interesting New Gene domain, with conserved cysteine. B1 and B2:

730 zinc-binding boxes. CC: coiled-coil domain. Two SUMOylation sites are indicated by

731 aqua blue circles labeled with an S. These sites were mutated from lysine to arginine in

732 the SUMOylation-deficient mutant protein encoded by the v5-hPMLVI (K160, 490R)

733 construct. (B) Expression of constructs and biochemical response of their products to

734 arsenite. Immunoblot analysis of CHO-K1 cells transiently expressing wild-type human

735 PMLVI or the SUMOylation-deficient mutant protein. The fractions soluble or

736 insoluble to radioimmunoprecipitation (RIPA) lysis buffer were immunoblotted (IB)

737 with the indicated antibodies. The cells were exposed to 3  $\mu$ M arsenite (As) for 3 hr.

738 Green asterisk indicates the biochemical response of the v5-hPMLVI (K160, 490R)

739 -encoded mutant protein to arsenite (i.e., corresponding to a shift into the

740 detergent-resistant nuclear matrix (Lallemand-Breitenbach et al., 2008)), which was

741 comparable to that seen with the unmutated protein encoded by the v5-hPMLVI

742 construct. (C and D) Representative images of the nuclei of GV oocytes injected with

743 the mRNA transcribed *in vitro* from plasmid v5-hPMLVI (encoding wild-type human

744 PMLVI) (C) or v5-hPMLVI (K160, 490R) (encoding human PMLVI with limited

745 avidity for SUMO) (D) and cultured for 46 hr or 48 hr, respectively, and then left

746 untreated (cont) or subjected to treatment with 3  $\mu$ M arsenite for 2 hr. Oocytes were

747 stained with anti-human PML (red) and Alexa 488-conjugated anti-SUMO2/3 (green)  
748 antibodies. NSN; non-surrounded nucleolus stage, SN; surrounded nucleolus stage.  
749 Scale bars, 2.00  $\mu\text{m}$ .

750

751 **Fig. S4, related to Fig. 4. Characterization of SUMO- SC35 droplets. (A and B)**

752 Representative images of the nuclei of maturing oocytes treated with dimethyl  
753 sulfoxide (DMSO, vehicle control) or 20  $\mu\text{M}$  ML-792 or 10  $\mu\text{M}$  MG132 for the  
754 indicated time. (A) Oocytes were stained with anti-SC35 (red) and Alexa  
755 488-conjugated anti-SUMO2/3 (green) antibodies. (B) Oocytes were stained with  
756 anti-Ubc9 antibody. (C) Comparison of the response of SC35 droplets with and  
757 without transcriptional inhibition. Representative images of the nuclei of maturing  
758 oocytes treated with DMSO or 1  $\mu\text{M}$  actinomycin D (AcD) for 16 hr. Oocytes were  
759 stained with anti-SC35 (red) and anti-Ubc9 (green) antibodies. Scale bars, 2.00  $\mu\text{m}$ .  
760 (D) Representative z-stack image of a maturing oocyte cultured in the presence of 1  
761  $\mu\text{M}$  epoxomicin (Epo), another proteasome inhibitor, for 45 hr. Oocytes were stained  
762 with anti-SUMO1 antibody. An enlarged image of the nucleus is shown at the bottom.  
763 BF, bright-field image of the oocyte. Scale bars, 19.9  $\mu\text{m}$ . (E) Representative images  
764 of post-morula-stage embryos. Embryos at 80 hr post-insemination (80 h.p.i.)  
765 subsequently were left untreated (cont) or exposed to heat shock at 42  $^{\circ}\text{C}$  for 2 hr.  
766 Embryos were stained with anti-SC35 (red) and Alexa 488-conjugated anti-SUMO2/3  
767 (green) antibodies. BF, bright-field images of the embryos. Scale bars, 19.9  $\mu\text{m}$ .

768

## References

- Andreu-Vieyra, C.V., Chen, R., Agno, J.E., Glaser, S., Anastassiadis, K., Stewart, A.F., and Matzuk, M.M. (2010). MLL2 is required in oocytes for bulk histone 3 lysine 4 trimethylation and transcriptional silencing. *PLoS biology* 8.
- Banani, S.F., Lee, H.O., Hyman, A.A., and Rosen, M.K. (2017). Biomolecular condensates: organizers of cellular biochemistry. *Nat Rev Mol Cell Biol* 18, 285-298.
- Banani, S.F., Rice, A.M., Peeples, W.B., Lin, Y., Jain, S., Parker, R., and Rosen, M.K. (2016). Compositional Control of Phase-Separated Cellular Bodies. *Cell* 166, 651-663.
- Bernardi, R., and Pandolfi, P.P. (2003). Role of PML and the PML-nuclear body in the control of programmed cell death. *Oncogene* 22, 9048-9057.
- Bernardi, R., Scaglioni, P.P., Bergmann, S., Horn, H.F., Vousden, K.H., and Pandolfi, P.P. (2004). PML regulates p53 stability by sequestering Mdm2 to the nucleolus. *Nature cell biology* 6, 665-672.
- Bersaglieri, C., and Santoro, R. (2019). Genome Organization in and around the Nucleolus. *Cells* 8.
- Bøe, S.O., Haave, M., Jul-Larsen, Å., Grudic, A., Bjerkvig, R., and Lønning, P.E. (2006). Promyelocytic leukemia nuclear bodies are predetermined processing sites for damaged DNA. *Journal of cell science* 119, 3284-3295.
- Bouniol-Baly, C., Hamraoui, L., Guibert, J., Beaujean, N., Szöllösi, M.S., and Debey, P. (1999). Differential transcriptional activity associated with chromatin configuration in fully grown mouse germinal vesicle oocytes. *Biology of Reproduction* 60, 580-587.
- Brownell, J.E., Sintchak, M.D., Gavin, J.M., Liao, H., Bruzzese, F.J., Bump, N.J., Soucy, T.A., Milhollen, M.A., Yang, X., Burkhardt, A.L., *et al.* (2010). Substrate-assisted inhibition of ubiquitin-like protein-activating enzymes: the NEDD8 E1 inhibitor

MLN4924 forms a NEDD8-AMP mimetic in situ. *Mol Cell* 37, 102-111.

Cappadocia, L., Mascle, X.H., Bourdeau, V., Tremblay-Belzile, S., Chaker-Margot, M., Lussier-Price, M., Wada, J., Sakaguchi, K., Aubry, M., Ferbeyre, G., *et al.* (2015).

Structural and functional characterization of the phosphorylation-dependent interaction between PML and SUMO1. *Structure* 23, 126-138.

Chelbi-Alix, M., Pelicano, L., Quignon, F., Koken, M., Venturini, L., Stadler, M., Pavlovic, J., and Degos, L. (1995). Induction of the PML protein by interferons in normal and APL cells. *Leukemia* 9, 2027-2033.

Cho, S., Park, J.S., and Kang, Y.-K. (2011). Dual Functions of Histone-Lysine N-Methyltransferase Setdb1 Protein at Promyelocytic Leukemia-Nuclear Body (PML-NB) MAINTAINING PML-NB STRUCTURE AND REGULATING THE EXPRESSION OF ITS ASSOCIATED GENES. *Journal of Biological Chemistry* 286, 41115-41124.

De La Fuente, R. (2006). Chromatin modifications in the germinal vesicle (GV) of mammalian oocytes. *Developmental biology* 292, 1-12.

De La Fuente, R., Viveiros, M.M., Burns, K.H., Adashi, E.Y., Matzuk, M.M., and Eppig, J.J. (2004). Major chromatin remodeling in the germinal vesicle (GV) of mammalian oocytes is dispensable for global transcriptional silencing but required for centromeric heterochromatin function. *Developmental biology* 275, 447-458.

Dellaire, G., Eskiw, C.H., Dehghani, H., Ching, R.W., and Bazett-Jones, D.P. (2006). Mitotic accumulations of PML protein contribute to the re-establishment of PML nuclear bodies in G1. *Journal of cell science* 119, 1034-1042.

Ding, Y., Kaido, M., Llano, E., Pendas, A.M., and Kitajima, T.S. (2018). The Post-anaphase SUMO Pathway Ensures the Maintenance of Centromeric Cohesion

through Meiosis I-II Transition in Mammalian Oocytes. *Curr Biol* 28, 1661-1669 e1664.

Draskovic, I., Arnoult, N., Steiner, V., Bacchetti, S., Lomonte, P., and Londoño-Vallejo,

A. (2009). Probing PML body function in ALT cells reveals spatiotemporal

requirements for telomere recombination. *Proceedings of the National Academy of Sciences* 106, 15726-15731.

Ebrahimian, M., Mojtahedzadeh, M., Bazett-Jones, D., and Dehghani, H. (2010).

Transcript isoforms of promyelocytic leukemia in mouse male and female gametes.

*Cells Tissues Organs* 192, 374-381.

Everett, R.D., and Chelbi-Alix, M.K. (2007). PML and PML nuclear bodies:

implications in antiviral defence. *Biochimie* 89, 819-830.

Ferbeyre, G., de Stanchina, E., Querido, E., Baptiste, N., Prives, C., and Lowe, S.W.

(2000). PML is induced by oncogenic ras and promotes premature senescence. *Genes & development* 14, 2015-2027.

Feric, M., Vaidya, N., Harmon, T.S., Mitrea, D.M., Zhu, L., Richardson, T.M., Kriwacki,

R.W., Pappu, R.V., and Brangwynne, C.P. (2016). Coexisting Liquid Phases Underlie

Nucleolar Subcompartments. *Cell* 165, 1686-1697.

Flemr, M., Ma, J., Schultz, R.M., and Svoboda, P. (2010). P-body loss is concomitant

with formation of a messenger RNA storage domain in mouse oocytes. *Biol Reprod* 82, 1008-1017.

Flynn, R.L., Cox, K.E., Jeitany, M., Wakimoto, H., Bryll, A.R., Ganem, N.J., Bersani, F.,

Pineda, J.R., Suvà, M.L., and Benes, C.H. (2015). Alternative lengthening of telomeres renders cancer cells hypersensitive to ATR inhibitors. *Science* 347, 273-277.

Fu, C., Ahmed, K., Ding, H., Ding, X., Lan, J., Yang, Z., Miao, Y., Zhu, Y., Shi, Y., and

Zhu, J. (2005). Stabilization of PML nuclear localization by conjugation and

oligomerization of SUMO-3. *Oncogene* 24, 5401-5413.

Fulka, H., and Aoki, F. (2016). Nucleolus Precursor Bodies and Ribosome Biogenesis in Early Mammalian Embryos: Old Theories and New Discoveries. *Biol Reprod* 94, 143.

Fulka, H., Rychtarova, J., and Loi, P. (2020). The nucleolus-like and precursor bodies of mammalian oocytes and embryos and their possible role in post-fertilization centromere remodelling. *Biochem Soc Trans* 48, 581-593.

Goddard, A., Yuan, J., Fairbairn, L., Dexter, M., Borrow, J., Kozak, C., and Solomon, E. (1995). Cloning of the murine homolog of the leukemia-associated PML gene.

*Mammalian Genome* 6, 732-737.

He, X., Riceberg, J., Soucy, T., Koenig, E., Minissale, J., Gallery, M., Bernard, H., Yang, X., Liao, H., Rabino, C., *et al.* (2017). Probing the roles of SUMOylation in cancer cell biology by using a selective SAE inhibitor. *Nat Chem Biol* 13, 1164-1171.

Hirano, S., Tadano, M., Kobayashi, Y., Udagawa, O., and Kato, A. (2015). Solubility shift and SUMOylation of promyelocytic leukemia (PML) protein in response to arsenic(III) and fate of the SUMOylated PML. *Toxicol Appl Pharmacol* 287, 191-201.

Hirano, S., Udagawa, O., Kobayashi, Y., and Kato, A. (2018). Solubility changes of promyelocytic leukemia (PML) and SUMO monomers and dynamics of PML nuclear body proteins in arsenite-treated cells. *Toxicology and applied pharmacology* 360, 150-159.

Ihara, M., Stein, P., and Schultz, R.M. (2008). UBE2I (UBC9), a SUMO-conjugating enzyme, localizes to nuclear speckles and stimulates transcription in mouse oocytes. *Biol Reprod* 79, 906-913.

Inoue, A., Akiyama, T., Nagata, M., and Aoki, F. (2007). The perivitelline space-forming capacity of mouse oocytes is associated with meiotic competence.

Journal of Reproduction and Development 53, 1043-1052.

Jeanne, M., Lallemand-Breitenbach, V., Ferhi, O., Koken, M., Le Bras, M., Duffort, S., Peres, L., Berthier, C., Soilihi, H., Raught, B., *et al.* (2010). PML/RARA oxidation and arsenic binding initiate the antileukemia response of As<sub>2</sub>O<sub>3</sub>. *Cancer Cell* 18, 88-98.

Lallemand-Breitenbach, V., and de Thé, H. (2018). PML nuclear bodies: from architecture to function. *Curr Opin Cell Biol* 52, 154-161.

Lallemand-Breitenbach, V., Jeanne, M., Benhenda, S., Nasr, R., Lei, M., Peres, L., Zhou, J., Zhu, J., Raught, B., and de Thé, H. (2008). Arsenic degrades PML or PML-RAR $\alpha$  through a SUMO-triggered RNF4/ubiquitin-mediated pathway. *Nature cell biology* 10, 547-555.

Lallemand-Breitenbach, V., Zhu, J., Puvion, F., Koken, M., Honoré, N., Doubeikovsky, A., Duprez, E., Pandolfi, P.P., Puvion, E., and Freemont, P. (2001). Role of promyelocytic leukemia (PML) sumolation in nuclear body formation, 11S proteasome recruitment, and As<sub>2</sub>O<sub>3</sub>-induced PML or PML/retinoic acid receptor  $\alpha$  degradation. *The Journal of experimental medicine* 193, 1361-1372.

Lamond, A.I., and Earnshaw, W.C. (1998). Structure and function in the nucleus. *Science* 280, 547-553.

Li, Y., Ma, X., Chen, Z., Wu, H., Wang, P., Wu, W., Cheng, N., Zeng, L., Zhang, H., Cai, X., *et al.* (2019). B1 oligomerization regulates PML nuclear body biogenesis and leukemogenesis. *Nat Commun* 10, 3789.

Louria-Hayon, I., Grossman, T., Sionov, R.V., Alsheich, O., Pandolfi, P.P., and Haupt, Y. (2003). The promyelocytic leukemia protein protects p53 from Mdm2-mediated inhibition and degradation. *Journal of Biological Chemistry* 278, 33134-33141.

Lunardi, A., Gaboli, M., Giorgio, M., Rivi, R., Bygrave, A., Antoniou, M., Drabek, D.,

Dzierzak, E., Fagioli, M., and Salmena, L. (2011). A role for PML in innate immunity. *Genes & cancer* 2, 10-19.

Mediani, L., Guillen-Boixet, J., Vinet, J., Franzmann, T.M., Bigi, I., Mateju, D., Carra, A.D., Morelli, F.F., Tiago, T., Poser, I., *et al.* (2019). Defective ribosomal products challenge nuclear function by impairing nuclear condensate dynamics and immobilizing ubiquitin. *EMBO J* 38, e101341.

Mueller, S., Miller Jr, W.H., and Dejean, A. (1998). Trivalent Antimonials Induce Degradation of the PML-RAR $\alpha$  Oncoprotein and Reorganization of the Promyelocytic Leukemia Nuclear Bodies in Acute Promyelocytic Leukemia NB4 Cells. *Blood, The Journal of the American Society of Hematology* 92, 4308-4316.

Nacerddine, K., Lehembre, F., Bhaumik, M., Artus, J., Cohen-Tannoudji, M., Babinet, C., Pandolfi, P.P., and Dejean, A. (2005). The SUMO pathway is essential for nuclear integrity and chromosome segregation in mice. *Developmental cell* 9, 769-779.

Nisole, S., Maroui, M.A., Mascle, X., Aubry, M., and Chelbi-Alix, M.K. (2013). Differential roles of PML isoforms. *Frontiers in oncology* 3, 125.

Niwa-Kawakita, M., Ferhi, O., Soilihi, H., Le Bras, M., Lallemand-Breitenbach, V., and de Thé, H. (2017). PML is a ROS sensor activating p53 upon oxidative stress. *Journal of Experimental Medicine* 214, 3197-3206.

Pearson, M., Carbone, R., Sebastiani, C., Cioce, M., Fagioli, M., Saito, S.i., Higashimoto, Y., Appella, E., Minucci, S., and Pandolfi, P.P. (2000). PML regulates p53 acetylation and premature senescence induced by oncogenic Ras. *Nature* 406, 207-210.

Puvion-Dutilleul, F., Chelbi-Alix, M.K., Koken, M., Quignon, F., Puvion, E., and De Thé, H. (1995). Adenovirus infection induces rearrangements in the intranuclear distribution of the nuclear body-associated PML protein. *Experimental cell research* 218,



9-16.

Racki, W.J., and Richter, J.D. (2006). CPEB controls oocyte growth and follicle development in the mouse. *Development* *133*, 4527-4537.

Rodriguez, A., Briley, S.M., Patton, B.K., Tripurani, S.K., Rajapakshe, K., Coarfa, C., Rajkovic, A., Andrieux, A., Dejean, A., and Pangas, S.A. (2019). Loss of the E2 SUMO-conjugating enzyme Ube2i in oocytes during ovarian folliculogenesis causes infertility in mice. *Development* *146*.

Sahin, U., Ferhi, O., Jeanne, M., Benhenda, S., Berthier, C., Jollivet, F., Niwa-Kawakita, M., Faklaris, O., Setterblad, N., de The, H., *et al.* (2014). Oxidative stress-induced assembly of PML nuclear bodies controls sumoylation of partner proteins. *J Cell Biol* *204*, 931-945.

Sundqvist, A., Liu, G., Mirsaliotis, A., and Xirodimas, D.P. (2009). Regulation of nucleolar signalling to p53 through NEDDylation of L11. *EMBO reports* *10*, 1132-1139.

Uozumi, N., Matsumoto, H., and Saitoh, H. (2016). Detection of O-propargyl-puromycin with SUMO and ubiquitin by click chemistry at PML-nuclear bodies during abortive proteasome activities. *Biochem Biophys Res Commun* *474*, 247-251.

Wang, L., Wansleben, C., Zhao, S., Miao, P., Paschen, W., and Yang, W. (2014). SUMO2 is essential while SUMO3 is dispensable for mouse embryonic development. *EMBO reports* *15*, 878-885.

Wang, P., Benhenda, S., Wu, H., Lallemand-Breitenbach, V., Zhen, T., Jollivet, F., Peres, L., Li, Y., Chen, S.J., Chen, Z., *et al.* (2018). RING tetramerization is required for nuclear body biogenesis and PML sumoylation. *Nat Commun* *9*, 1277.

Wang, Z.B., Ou, X.H., Tong, J.S., Li, S., Wei, L., Ouyang, Y.C., Hou, Y., Schatten, H., and Sun, Q.Y. (2010). The SUMO pathway functions in mouse oocyte maturation. *Cell Cycle* 9, 2640-2646.

Wang, Z.G., Delva, L., Gaboli, M., Rivi, R., Giorgio, M., Cordon-Cardo, C., Grosveld, F., and Pandolfi, P.P. (1998). Role of PML in cell growth and the retinoic acid pathway. *Science* 279, 1547-1551.

Yamazaki, T., Yamamoto, T., Yoshino, H., Souquere, S., Nakagawa, S., Pierron, G., and Hirose, T. (2021). Paraspeckles are constructed as block copolymer micelles. *EMBO J* 40, e107270.

Yuan, Y.F., Zhai, R., Liu, X.M., Khan, H.A., Zhen, Y.H., and Huo, L.J. (2014). SUMO-1 plays crucial roles for spindle organization, chromosome congression, and chromosome segregation during mouse oocyte meiotic maturation. *Mol Reprod Dev* 81, 712-724.

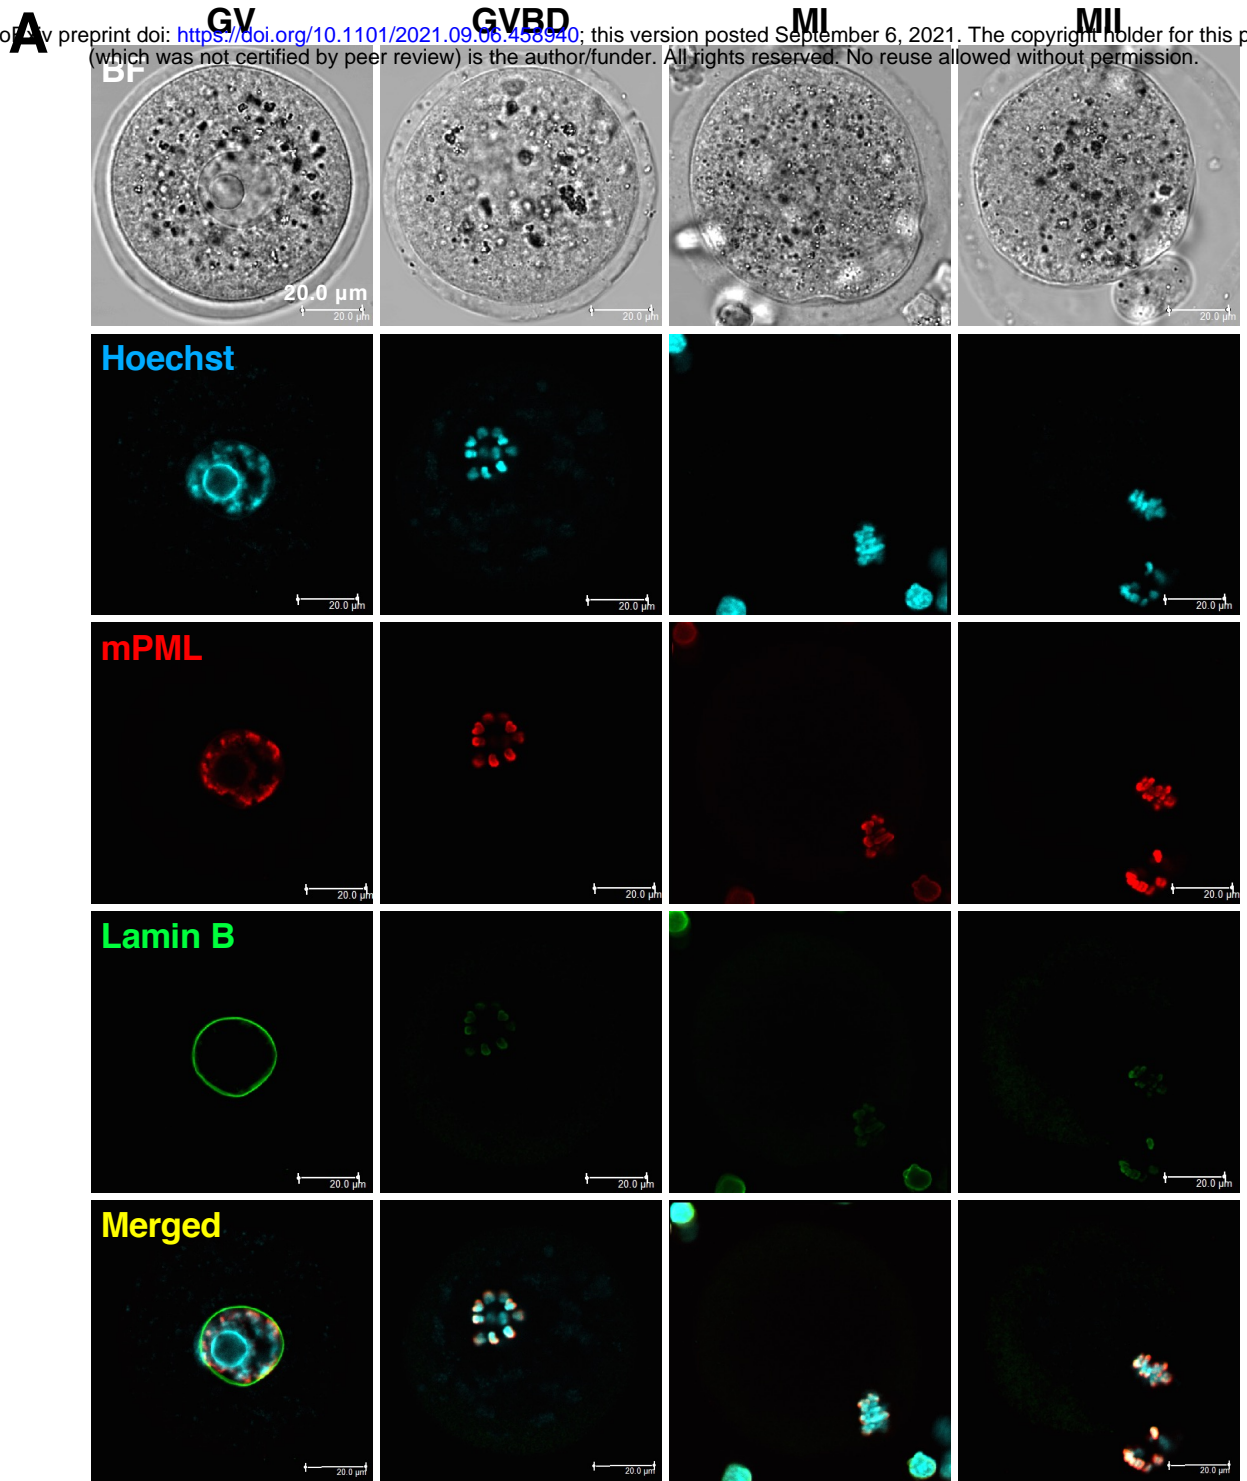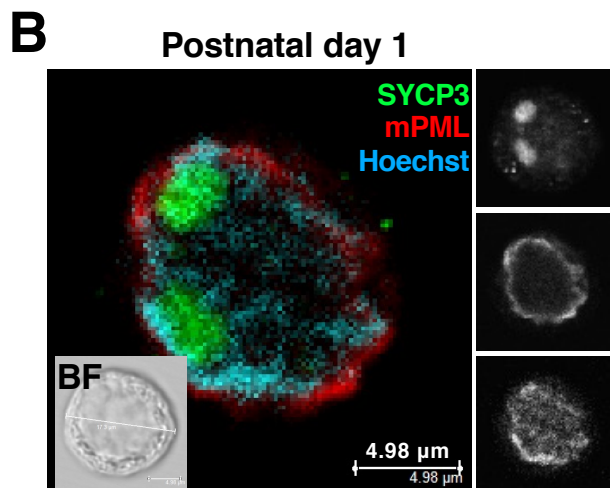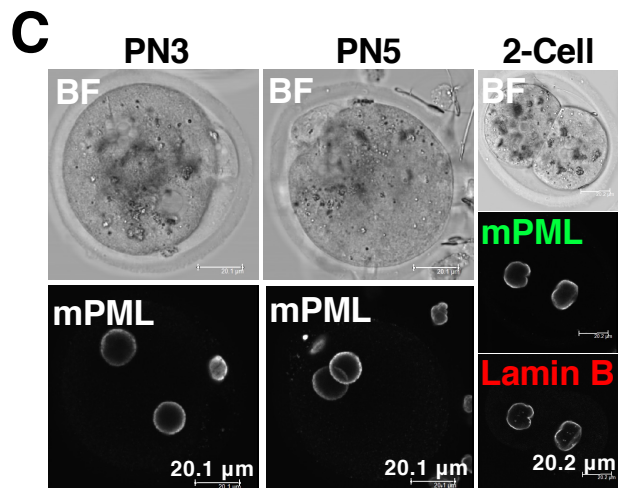

Fig. 1

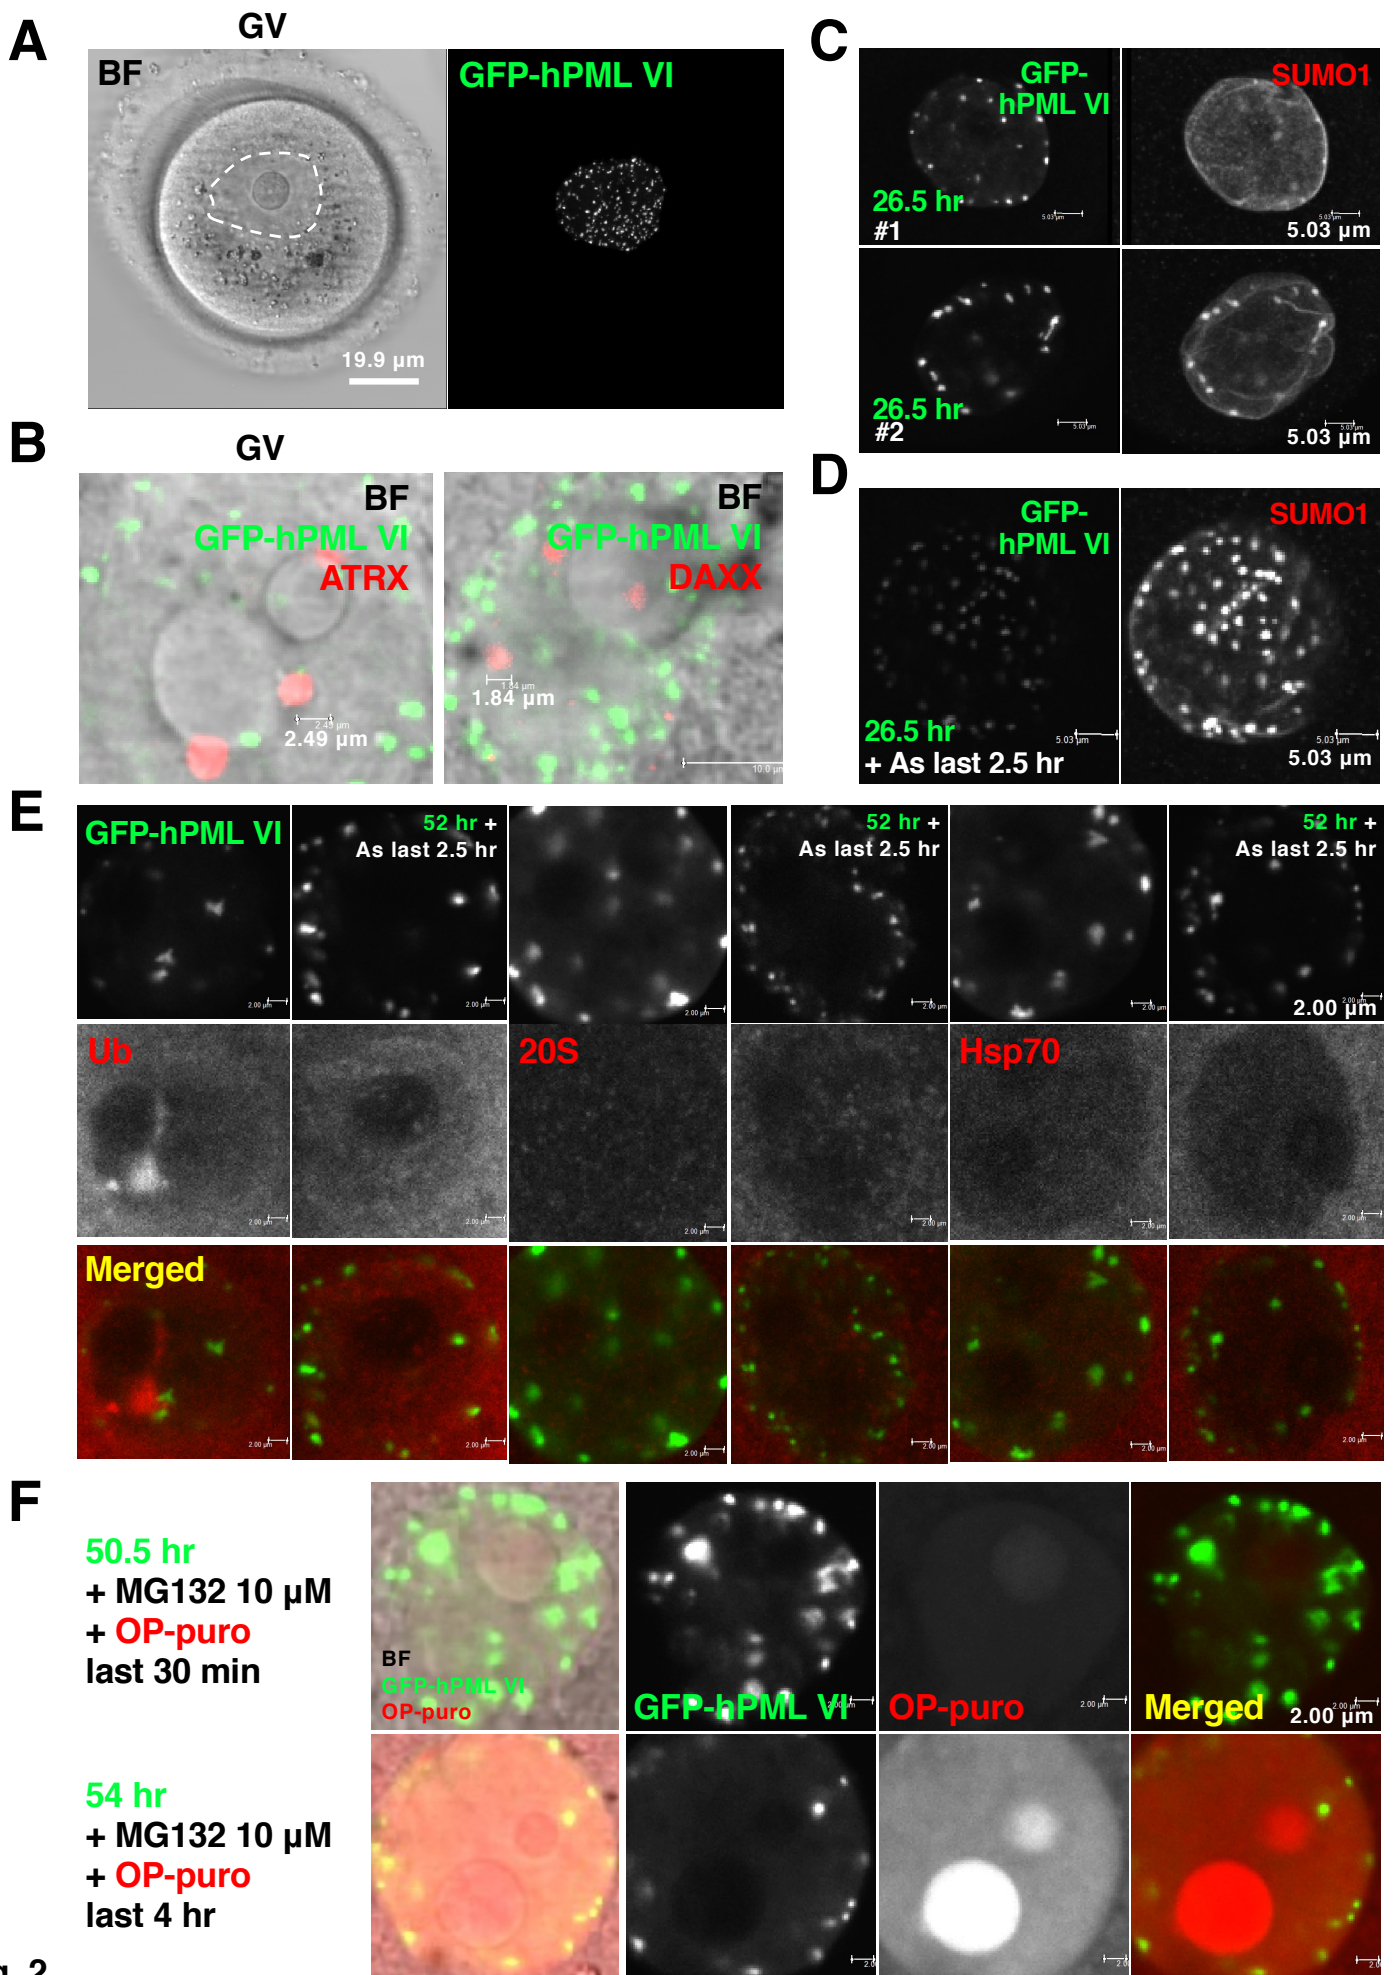

Fig. 2

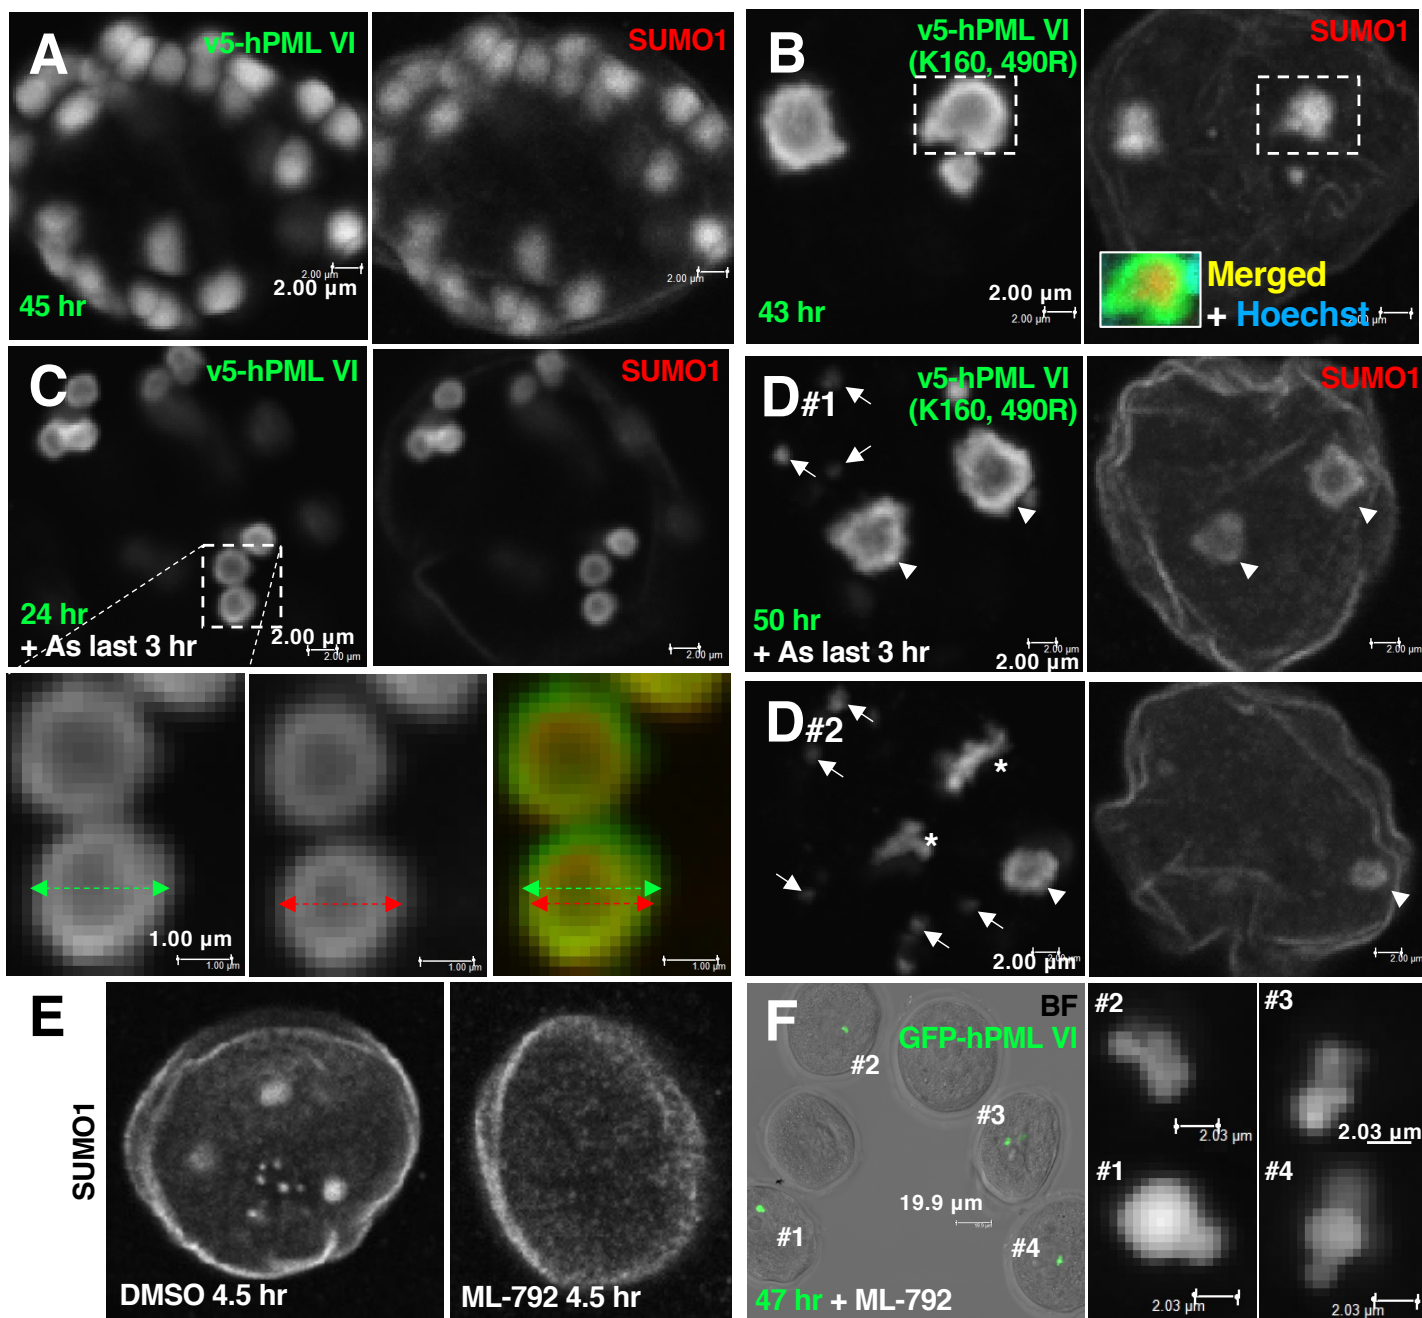

Fig. 3

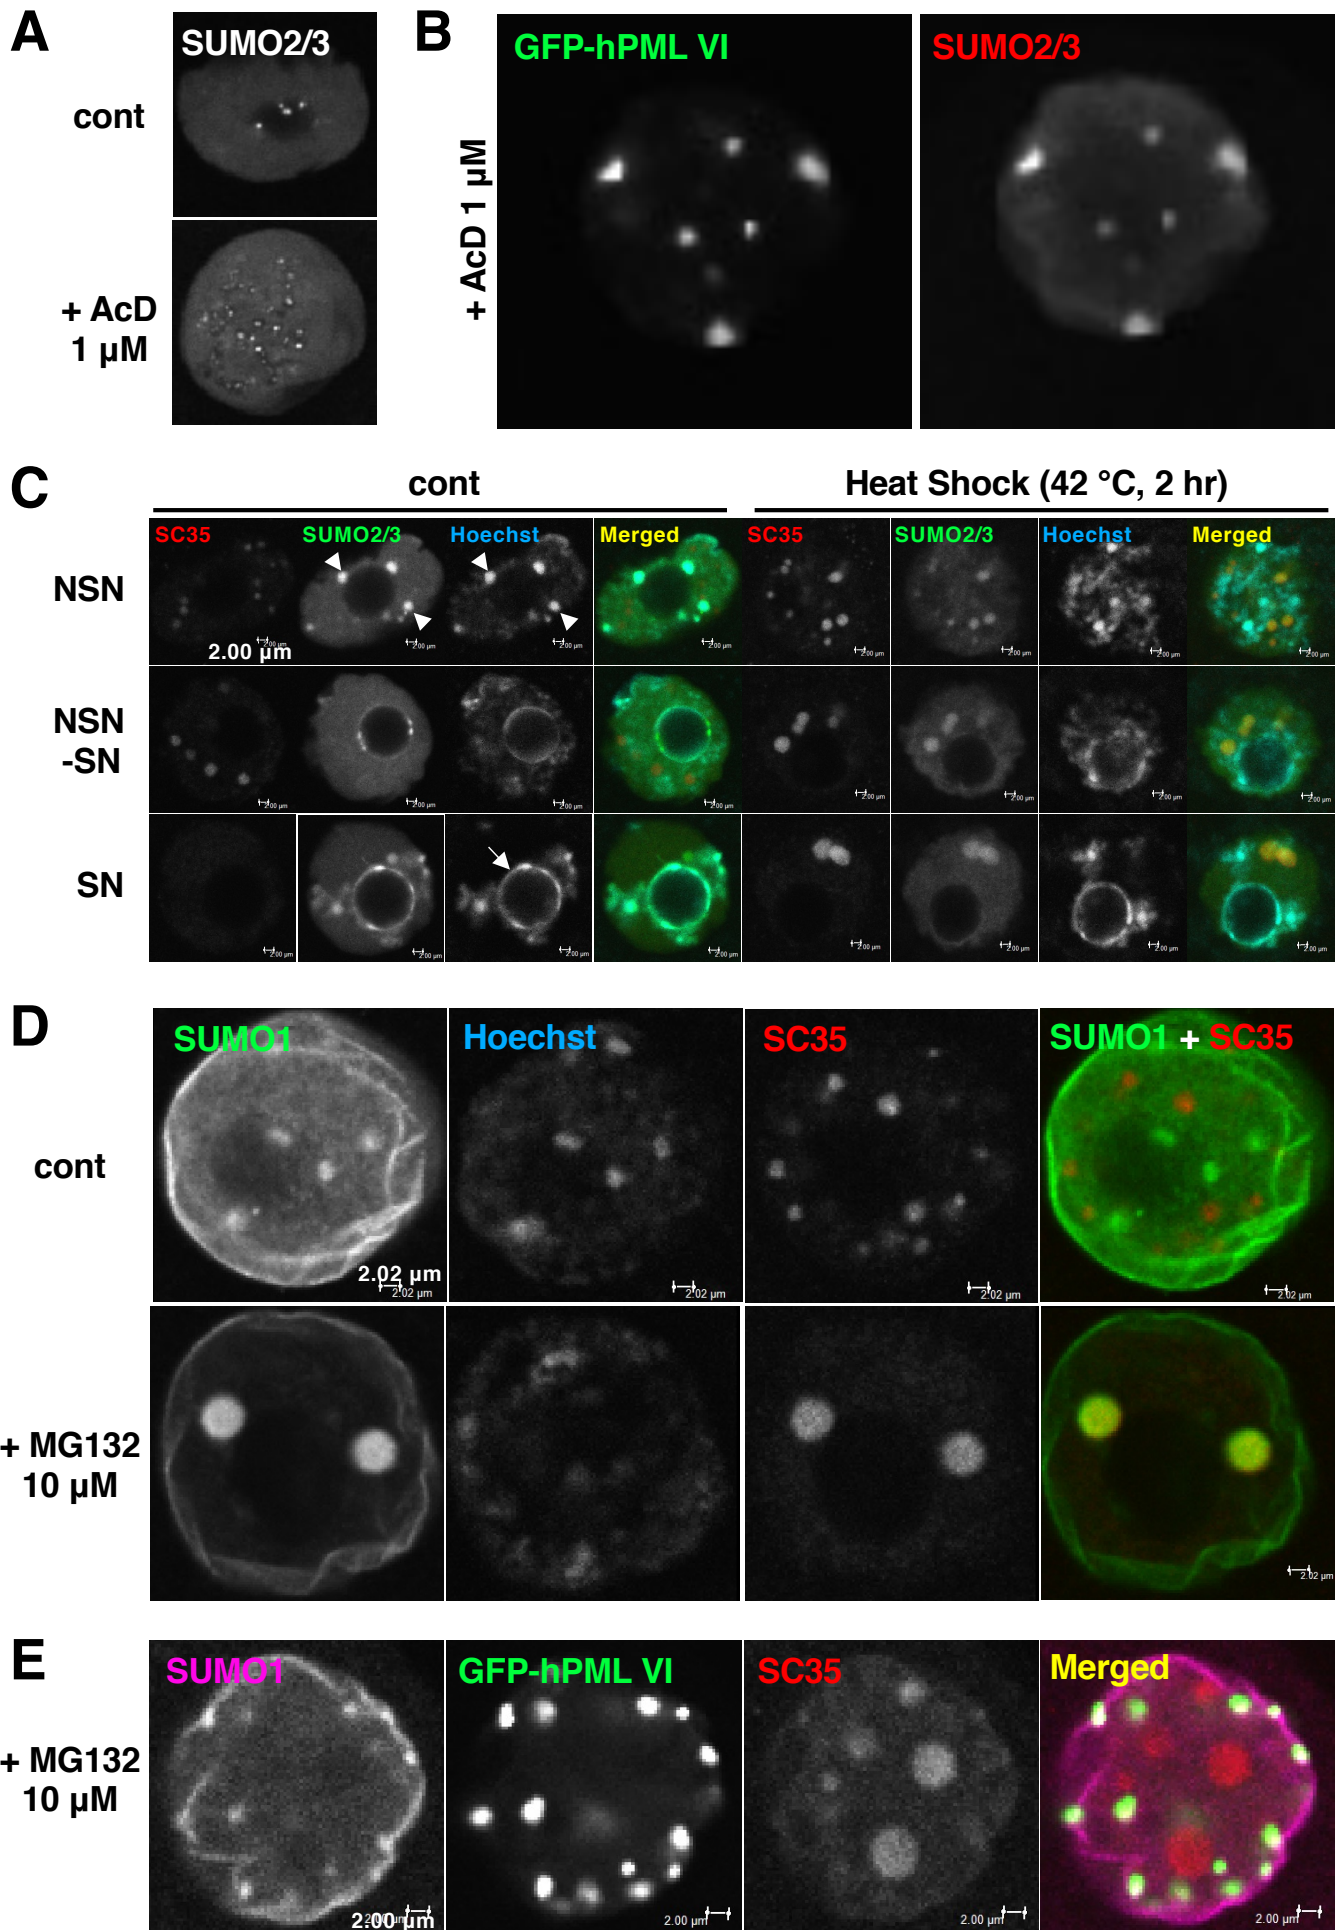

Fig. 4
